# Supplementary material for: Dynamic analysis of growth characteristics, secondary metabolites accumulation, and an in-depth understanding of anthraquinones biosynthesis in Rubia cordifolia Linn
Source: Front Plant Sci. 2025 Jan 7;15:1504863. doi: 10.3389/fpls.2024.1504863 (PMC11747278; doi:10.3389/fpls.2024.1504863)
Supplement: Supplementary file 4 [file Table4.xlsx]

## Sheet: Sheet1
Supplementary Table 4 KEGG classification of full-length transcript annotation in R. cordifolia
#pathway	pathway_id	Gene_number	Gene_id	KOs
Glycolysis / Gluconeogenesis	ko00010	508	tissues_transcript_10067;tissues_transcript_10076;tissues_transcript_10309;tissues_transcript_10593;tissues_transcript_10764;tissues_transcript_10793;tissues_transcript_10890;tissues_transcript_11073;tissues_transcript_11425;tissues_transcript_11557;tissues_transcript_11986;tissues_transcript_12414;tissues_transcript_12781;tissues_transcript_12919;tissues_transcript_12935;tissues_transcript_13116…	K00002+K00162+K01568+K00121+K01803+K01792+K00002+K18857+K00001+K00850+K01803+K00121+K00850+K03841+K01803+K00850+K03841+K00873+K00128+K03841+K01568+K00128+K01895+K00002+K00128+K00134+K00002+K03103+K00001+K01803+K01689+K01792+K00128+K00121+K00128+K01610+K00121+K00016+K00927+K00121+K01610+K15634+K01568+K01623+K00850+K00844+K01895+K00121+K18857+K00001+K01803+K00128+K00850+K14085+K01623+K01623+K15633+…
Citrate cycle (TCA cycle)	ko00020	189	tissues_transcript_10076;tissues_transcript_11540;tissues_transcript_16054;tissues_transcript_16278;tissues_transcript_17;tissues_transcript_17897;tissues_transcript_18262;tissues_transcript_18298;tissues_transcript_18599;tissues_transcript_1942;tissues_transcript_19605;tissues_transcript_20221;tissues_transcript_20571;tissues_transcript_2063;tissues_transcript_2107;tissues_transcript_24519;tissu…	K00162+K01647+K00236+K01679+K00031+K01681+K01900+K00031+K00164+K01610+K01648+K00026+K00030+K01610+K00234+K01610+K00161+K00658+K00031+K00234+K00627+K00234+K01648+K00164+K00382+K01648+K00026+K00030+K00236+K01681+K01610+K00164+K01647+K01681+K00026+K01681+K00235+K00627+K01648+K01610+K00030+K01681+K01679+K01648+K01610+K00162+K00161+K00234+K00161+K00234+K00236+K01679+K01647+K00026+K00658+K01610+K00161+…
Pentose phosphate pathway	ko00030	183	tissues_transcript_10273;tissues_transcript_10414;tissues_transcript_10698;tissues_transcript_11089;tissues_transcript_11557;tissues_transcript_11601;tissues_transcript_12201;tissues_transcript_12386;tissues_transcript_12781;tissues_transcript_12919;tissues_transcript_13116;tissues_transcript_13209;tissues_transcript_13919;tissues_transcript_14152;tissues_transcript_1443;tissues_transcript_14797;…	K01783+K01807+K01057+K01057+K00850+K00852+K01057+K01057+K00850+K03841+K00850+K03841+K01807+K00033+K00615+K00033+K03841+K00615+K01783+K01623+K00850+K00850+K01623+K01623+K00615+K00948+K01835+K01810+K00948+K01810+K01810+K01623+K01810+K01624+K01807+K01835+K01623+K00851+K00850+K01623+K00948+K01810+K01835+K01835+K01810+K00948+K01623+K01623+K01623+K00036+K00895+K00616+K01810+K01835+K00895+K01624+K00850+…
Pentose and glucuronate interconversions	ko00040	210	tissues_transcript_10067;tissues_transcript_10273;tissues_transcript_10326;tissues_transcript_10890;tissues_transcript_11119;tissues_transcript_11471;tissues_transcript_12086;tissues_transcript_12128;tissues_transcript_12555;tissues_transcript_12763;tissues_transcript_13336;tissues_transcript_14327;tissues_transcript_1451;tissues_transcript_14934;tissues_transcript_15170;tissues_transcript_15280;…	K00002+K01783+K01213+K00002+K01051+K00854+K01728+K01051+K01051+K01213+K01051+K01213+K01213+K01051+K01051+K00875+K01184+K01051+K00002+K16190+K00002+K01728+K01728+K01728+K01051+K00963+K01783+K01213+K01051+K00002+K01051+K01051+K01051+K01213+K00963+K01051+K01213+K01728+K01051+K01051+K01213+K00963+K00012+K00963+K12447+K01051+K00963+K12447+K12447+K01051+K12447+K01184+K01051+K01184+K01213+K00002+K01213+…
Fructose and mannose metabolism	ko00051	188	tissues_transcript_10189;tissues_transcript_10522;tissues_transcript_10764;tissues_transcript_10765;tissues_transcript_11372;tissues_transcript_11557;tissues_transcript_11986;tissues_transcript_12781;tissues_transcript_12919;tissues_transcript_12935;tissues_transcript_13116;tissues_transcript_13209;tissues_transcript_13623;tissues_transcript_13816;tissues_transcript_1392;tissues_transcript_15358;…	K00847+K00847+K01803+K00847+K17497+K00850+K01803+K00850+K03841+K01803+K00850+K03841+K00847+K00847+K01103+K03841+K00847+K01803+K17497+K01623+K00850+K00844+K01803+K00850+K01623+K01623+K19355+K18447+K01623+K05305+K19355+K01624+K00847+K01623+K00844+K00966+K00850+K01623+K00847+K00847+K00847+K01803+K01809+K01623+K00847+K01623+K19355+K17497+K01809+K01623+K00844+K00895+K02377+K01803+K00895+K01803+K00966+…
Galactose metabolism	ko00052	206	tissues_transcript_10614;tissues_transcript_11557;tissues_transcript_1158;tissues_transcript_1184;tissues_transcript_1209;tissues_transcript_12781;tissues_transcript_13116;tissues_transcript_1497;tissues_transcript_15689;tissues_transcript_16013;tissues_transcript_16878;tissues_transcript_16897;tissues_transcript_16939;tissues_transcript_1724;tissues_transcript_1759;tissues_transcript_17986;tissu…	K06611+K00850+K06617+K06617+K06617+K00850+K00850+K12309+K06617+K07407+K12309+K07407+K06617+K12309+K12309+K01193+K06617+K00963+K00850+K00844+K06617+K00850+K01835+K01193+K12309+K12309+K01193+K18819+K01187+K07407+K01835+K00963+K00844+K01193+K00850+K06617+K01190+K00963+K01835+K07407+K00963+K12447+K01835+K12309+K00963+K12309+K01193+K12447+K01190+K12447+K12309+K06617+K12447+K06611+K00844+K12309+K01835+…
Ascorbate and aldarate metabolism	ko00053	157	tissues_transcript_10037;tissues_transcript_1033;tissues_transcript_10409;tissues_transcript_12586;tissues_transcript_13342;tissues_transcript_13355;tissues_transcript_15185;tissues_transcript_1554;tissues_transcript_15893;tissues_transcript_16285;tissues_transcript_16691;tissues_transcript_16718;tissues_transcript_17547;tissues_transcript_18377;tissues_transcript_18779;tissues_transcript_20800;t…	K00103+K00423+K00469+K00434+K21888+K21888+K00128+K00434+K00434+K00128+K16190+K00128+K00434+K00128+K00128+K08232+K00128+K14085+K08232+K00103+K00103+K00128+K08232+K14190+K00128+K00423+K00434+K00128+K00423+K00012+K14190+K12447+K14085+K12447+K12447+K12447+K00434+K00128+K12447+K17744+K12447+K00128+K10047+K00225+K00423+K00434+K12447+K08232+K10047+K00128+K00103+K14190+K00434+K00434+K08232+K00128+K10047+…
Fatty acid biosynthesis	ko00061	125	tissues_transcript_10160;tissues_transcript_10339;tissues_transcript_10648;tissues_transcript_10911;tissues_transcript_12002;tissues_transcript_12767;tissues_transcript_13230;tissues_transcript_14145;tissues_transcript_1447;tissues_transcript_1496;tissues_transcript_1509;tissues_transcript_15117;tissues_transcript_1539;tissues_transcript_15436;tissues_transcript_15512;tissues_transcript_15896;tis…	K03921+K03921+K02160+K00059+K00059+K01897+K00059+K01897+K01897+K01897+K01897+K01962+K01897+K09458+K01897+K01962+K10781+K00208+K01963+K01897+K01897+K00059+K01963+K01897+K01897+K01897+K01897+K00648+K07512+K01897+K01961+K09458+K11262+K18660+K10781+K01897+K01897+K11262+K01897+K01897+K00059+K01961+K03921+K00645+K07512+K01963+K09458+K01963+K09458+K01897+K00208+K01897+K01897+K07512+K01897+K11262+K11262+…
Fatty acid elongation	ko00062	33	tissues_transcript_10456;tissues_transcript_15087;tissues_transcript_16261;tissues_transcript_26579;tissues_transcript_29147;tissues_transcript_30665;tissues_transcript_33552;tissues_transcript_33714;tissues_transcript_33924;tissues_transcript_36889;tissues_transcript_39522;tissues_transcript_40327;tissues_transcript_4051;tissues_transcript_41162;tissues_transcript_41823;tissues_transcript_43419;…	K10258+K15397+K10251+K07512+K15397+K10251+K15397+K15397+K15397+K07512+K15397+K15397+K15397+K15397+K15397+K07512+K15397+K10251+K15397+K01068+K10251+K10251+K10251+K15397+K15397+K15397+K01074+K10703+K15397+K01068+K10251+K01074+K15397
Fatty acid degradation	ko00071	230	tissues_transcript_10353;tissues_transcript_10593;tissues_transcript_11073;tissues_transcript_11425;tissues_transcript_12414;tissues_transcript_12767;tissues_transcript_14145;tissues_transcript_1447;tissues_transcript_1473;tissues_transcript_1496;tissues_transcript_1509;tissues_transcript_15185;tissues_transcript_1539;tissues_transcript_15512;tissues_transcript_1613;tissues_transcript_16285;tissu…	K00232+K00121+K18857+K00001+K00121+K01897+K01897+K01897+K10527+K01897+K01897+K00128+K01897+K01897+K10527+K00128+K10527+K00128+K10527+K00232+K00001+K00128+K00121+K00128+K00121+K00121+K01897+K00121+K18857+K00001+K00128+K01897+K14085+K00232+K10527+K00001+K00128+K07513+K18857+K00001+K07517+K18857+K01897+K01897+K00232+K01897+K18857+K01897+K00232+K00121+K00128+K01897+K07513+K18857+K18857+K01692+K00128+…
Synthesis and degradation of ketone bodies	ko00072	13	tissues_transcript_31348;tissues_transcript_34355;tissues_transcript_36092;tissues_transcript_41970;tissues_transcript_46317;tissues_transcript_47239;tissues_transcript_5145;tissues_transcript_53616;tissues_transcript_5997;tissues_transcript_68599;tissues_transcript_7097;tissues_transcript_73903;tissues_transcript_7575;	K00626+K01640+K01640+K01640+K01640+K00626+K01641+K01640+K01640+K01640+K00626+K01641+K00626
Cutin, suberine and wax biosynthesis	ko00073	44	tissues_transcript_13751;tissues_transcript_2079;tissues_transcript_26170;tissues_transcript_31051;tissues_transcript_31737;tissues_transcript_32523;tissues_transcript_34354;tissues_transcript_36374;tissues_transcript_36705;tissues_transcript_36838;tissues_transcript_37651;tissues_transcript_38335;tissues_transcript_39445;tissues_transcript_39993;tissues_transcript_41725;tissues_transcript_41924;…	K17991+K15404+K15406+K20495+K20769+K20769+K20495+K21995+K15400+K15398+K15404+K20769+K15405+K15402+K15400+K15405+K15398+K13356+K13407+K15406+K17991+K20769+K15398+K15403+K13407+K15405+K13356+K15398+K15400+K17991+K20495+K20495+K20769+K15400+K21995+K21995+K20769+K15404+K15406+K20495+K15406+K15406+K20495+K15400
Steroid biosynthesis	ko00100	66	tissues_transcript_10032;tissues_transcript_13037;tissues_transcript_1701;tissues_transcript_18095;tissues_transcript_18295;tissues_transcript_19048;tissues_transcript_19072;tissues_transcript_19648;tissues_transcript_19774;tissues_transcript_22277;tissues_transcript_24515;tissues_transcript_24912;tissues_transcript_29154;tissues_transcript_29365;tissues_transcript_29586;tissues_transcript_29664;…	K14674+K01853+K01052+K14674+K08242+K01853+K00213+K00213+K00213+K01853+K00213+K01853+K01853+K00511+K00511+K09832+K01052+K05917+K00559+K00801+K00801+K01853+K09831+K00511+K01052+K01052+K00801+K14424+K00511+K05917+K00227+K14674+K00213+K00222+K00213+K01853+K00511+K01052+K09828+K14423+K00559+K09828+K01052+K23558+K00213+K23558+K05917+K00511+K00511+K01824+K01052+K01853+K23558+K01824+K00511+K00213+K00511+…
Ubiquinone and other terpenoid-quinone biosynthesis	ko00130	113	tissues_transcript_10262;tissues_transcript_10607;tissues_transcript_11003;tissues_transcript_11124;tissues_transcript_11580;tissues_transcript_12638;tissues_transcript_13543;tissues_transcript_15189;tissues_transcript_15312;tissues_transcript_15539;tissues_transcript_15990;tissues_transcript_17192;tissues_transcript_17784;tissues_transcript_19255;tissues_transcript_19519;tissues_transcript_20046…	K00487+K18606+K18606+K00487+K14759+K03809+K18534+K02552+K03809+K19222+K18534+K19222+K14760+K03809+K14760+K00457+K18606+K00457+K19222+K01904+K14759+K06125+K14759+K02552+K06127+K06127+K03809+K05928+K03809+K01904+K06125+K00457+K14759+K03809+K01661+K14760+K06127+K00457+K03809+K01904+K00815+K09833+K06126+K01661+K14760+K00815+K01904+K01904+K00591+K06126+K06125+K14760+K01904+K06125+K14759+K14759+K01904+…
Oxidative phosphorylation	ko00190	380	tissues_transcript_101;tissues_transcript_10533;tissues_transcript_10559;tissues_transcript_10842;tissues_transcript_10907;tissues_transcript_11074;tissues_transcript_11514;tissues_transcript_11564;tissues_transcript_11642;tissues_transcript_11860;tissues_transcript_11920;tissues_transcript_11997;tissues_transcript_12000;tissues_transcript_12048;tissues_transcript_1211;tissues_transcript_12232;ti…	K02132+K03943+K01507+K02149+K01507+K01507+K02132+K03941+K02150+K01507+K01507+K02108+K02108+K01507+K03881+K02137+K02137+K02113+K02150+K02267+K03941+K03940+K02155+K03949+K02149+K02265+K02267+K02144+K02113+K02109+K03935+K11352+K02154+K02138+K02155+K05577+K03881+K00236+K03955+K03937+K03965+K02138+K03878+K03955+K11353+K02153+K03966+K01535+K02144+K03952+K01507+K03955+K02108+K02147+K02152+K03952+K02266+…
Photosynthesis	ko00195	172	tissues_transcript_10257;tissues_transcript_10939;tissues_transcript_11997;tissues_transcript_12000;tissues_transcript_12481;tissues_transcript_12527;tissues_transcript_12714;tissues_transcript_13476;tissues_transcript_13493;tissues_transcript_13500;tissues_transcript_14376;tissues_transcript_14472;tissues_transcript_14577;tissues_transcript_14734;tissues_transcript_14825;tissues_transcript_14844…	K02717+K02641+K02108+K02108+K02113+K02717+K02694+K02636+K02717+K02636+K02636+K02635+K02716+K02113+K08901+K02638+K02109+K02699+K02723+K02692+K02639+K02638+K02639+K03542+K02724+K08901+K02701+K02690+K02693+K03541+K14332+K08905+K02693+K08901+K02108+K03541+K02721+K02639+K02721+K03542+K02694+K02689+K02712+K08902+K02112+K02641+K02707+K02717+K02716+K02705+K02108+K02639+K02634+K08906+K02689+K02634+K02115+…
Photosynthesis - antenna proteins	ko00196	85	tissues_transcript_11612;tissues_transcript_11843;tissues_transcript_11862;tissues_transcript_12098;tissues_transcript_12108;tissues_transcript_12426;tissues_transcript_12559;tissues_transcript_12634;tissues_transcript_12647;tissues_transcript_12655;tissues_transcript_12772;tissues_transcript_12823;tissues_transcript_13224;tissues_transcript_13294;tissues_transcript_13364;tissues_transcript_13423…	K08912+K08914+K08908+K08908+K08916+K08909+K08912+K08909+K08913+K08915+K08914+K08912+K08908+K08915+K08910+K08912+K08912+K08912+K08907+K08917+K08911+K08912+K08908+K08912+K08916+K08913+K08917+K08913+K08912+K08908+K08912+K08907+K08917+K08909+K08908+K08912+K08909+K08914+K08907+K08915+K08910+K08908+K08915+K08912+K14172+K08916+K08912+K08912+K08912+K08915+K08909+K08909+K08912+K14172+K08912+K08912+K08915+…
Arginine biosynthesis	ko00220	89	tissues_transcript_12141;tissues_transcript_12742;tissues_transcript_13328;tissues_transcript_1390;tissues_transcript_17213;tissues_transcript_18266;tissues_transcript_21750;tissues_transcript_22053;tissues_transcript_24092;tissues_transcript_25990;tissues_transcript_26157;tissues_transcript_26607;tissues_transcript_26833;tissues_transcript_28836;tissues_transcript_29035;tissues_transcript_29161;…	K01915+K14682+K00262+K01915+K00262+K00811+K01427+K01427+K00262+K14454+K01915+K01915+K14677+K00814+K01915+K14677+K01476+K14454+K00611+K00262+K14682+K01915+K00145+K00814+K00814+K14454+K01476+K01915+K00262+K14677+K14682+K00814+K14272+K00814+K14677+K14677+K00261+K00818+K14677+K00814+K01940+K13427+K14272+K14454+K14455+K14677+K14454+K14272+K14677+K14682+K14454+K14454+K01427+K14455+K00811+K00145+K01940+…
Purine metabolism	ko00230	292	tissues_transcript_10;tissues_transcript_10840;tissues_transcript_11081;tissues_transcript_11377;tissues_transcript_12030;tissues_transcript_1250;tissues_transcript_12960;tissues_transcript_13227;tissues_transcript_13834;tissues_transcript_14;tissues_transcript_14563;tissues_transcript_1538;tissues_transcript_15406;tissues_transcript_15692;tissues_transcript_15859;tissues_transcript_15983;tissues…	K01952+K13811+K00940+K00365+K00939+K00951+K00860+K00873+K00951+K01952+K00759+K00759+K00939+K00940+K00951+K00939+K01756+K00088+K00602+K00860+K00759+K00939+K01952+K00940+K01490+K11808+K13811+K01427+K01427+K00939+K00873+K00764+K01513+K00948+K01835+K00942+K00939+K00873+K00940+K18447+K00106+K00948+K00873+K00939+K00873+K00940+K18151+K00940+K00873+K00759+K14977+K06928+K01835+K01466+K00873+K00940+K01081+…
Caffeine metabolism	ko00232	13	tissues_transcript_11377;tissues_transcript_25;tissues_transcript_32;tissues_transcript_34770;tissues_transcript_34869;tissues_transcript_35047;tissues_transcript_46161;tissues_transcript_55642;tissues_transcript_66868;tissues_transcript_69936;tissues_transcript_71617;tissues_transcript_73031;tissues_transcript_8410;	K00365+K00106+K00106+K00365+K00106+K00365+K00106+K00365+K00365+K00106+K00365+K00106+K00365
Pyrimidine metabolism	ko00240	161	tissues_transcript_10455;tissues_transcript_11081;tissues_transcript_143;tissues_transcript_15692;tissues_transcript_1638;tissues_transcript_16488;tissues_transcript_19894;tissues_transcript_2301;tissues_transcript_24117;tissues_transcript_24863;tissues_transcript_25145;tissues_transcript_2527;tissues_transcript_25378;tissues_transcript_25682;tissues_transcript_26214;tissues_transcript_26575;tiss…	K01489+K00940+K01955+K00940+K00876+K01955+K00940+K00876+K01513+K00940+K00876+K01937+K13800+K01464+K00940+K00940+K00940+K01081+K09903+K00857+K14641+K01510+K11540+K13800+K01513+K16904+K13800+K24242+K16329+K13800+K13800+K16904+K13800+K03787+K13800+K00876+K01240+K13800+K01937+K01510+K01510+K13998+K01510+K01240+K09903+K01955+K01240+K10807+K01464+K10807+K01955+K00940+K01081+K09903+K00940+K01510+K16904+…
Alanine, aspartate and glutamate metabolism	ko00250	183	tissues_transcript_10350;tissues_transcript_12085;tissues_transcript_12141;tissues_transcript_13328;tissues_transcript_1390;tissues_transcript_14242;tissues_transcript_143;tissues_transcript_15155;tissues_transcript_15802;tissues_transcript_16136;tissues_transcript_16408;tissues_transcript_16488;tissues_transcript_17213;tissues_transcript_17430;tissues_transcript_17697;tissues_transcript_18266;ti…	K13051+K13566+K01915+K00262+K01915+K00827+K01955+K00827+K00827+K00827+K01756+K01955+K00262+K00827+K01580+K00811+K00264+K00264+K17761+K00827+K13566+K01953+K00262+K00764+K00830+K01953+K01580+K00827+K00827+K14454+K01915+K17761+K00294+K13566+K01915+K17761+K13566+K13566+K00814+K01915+K17761+K11540+K00827+K14454+K17761+K00262+K01580+K01915+K00264+K00814+K00264+K00278+K00827+K00814+K00294+K00827+K17761+…
Glycine, serine and threonine metabolism	ko00260	203	tissues_transcript_11994;tissues_transcript_12916;tissues_transcript_1358;tissues_transcript_14242;tissues_transcript_14757;tissues_transcript_15155;tissues_transcript_1521;tissues_transcript_15234;tissues_transcript_15802;tissues_transcript_16068;tissues_transcript_16136;tissues_transcript_16242;tissues_transcript_17430;tissues_transcript_19209;tissues_transcript_1948;tissues_transcript_1950;tis…	K15893+K01754+K00276+K00827+K00600+K00827+K15919+K00600+K00827+K00058+K00827+K00276+K00827+K01733+K00276+K00600+K00827+K01696+K15634+K01695+K00928+K00058+K14085+K01695+K15633+K00830+K15919+K15633+K00605+K00058+K00827+K00827+K01695+K02437+K00600+K00382+K01695+K00600+K01079+K15919+K01733+K00600+K00281+K00058+K14085+K00827+K00600+K12235+K00276+K00276+K15633+K15893+K00600+K01695+K01695+K00827+K15893+…
Monobactam biosynthesis	ko00261	20	tissues_transcript_10840;tissues_transcript_2104;tissues_transcript_21373;tissues_transcript_29684;tissues_transcript_30891;tissues_transcript_3226;tissues_transcript_35048;tissues_transcript_36256;tissues_transcript_5035;tissues_transcript_55795;tissues_transcript_6157;tissues_transcript_620;tissues_transcript_63017;tissues_transcript_65568;tissues_transcript_6570;tissues_transcript_65708;tissue…	K13811+K00928+K13811+K13811+K13811+K00958+K13811+K12524+K13811+K13811+K01714+K12524+K00133+K13811+K01714+K01714+K13811+K00215+K12524+K13811
Cysteine and methionine metabolism	ko00270	294	tissues_transcript_10250;tissues_transcript_10308;tissues_transcript_10325;tissues_transcript_10383;tissues_transcript_10491;tissues_transcript_11313;tissues_transcript_11408;tissues_transcript_1194;tissues_transcript_12415;tissues_transcript_1263;tissues_transcript_1303;tissues_transcript_14242;tissues_transcript_14263;tissues_transcript_14865;tissues_transcript_14917;tissues_transcript_15155;ti…	K00549+K00826+K01738+K17398+K00547+K01244+K00547+K00549+K00797+K00558+K00549+K00827+K00789+K05396+K01761+K00827+K00827+K00058+K00827+K05396+K21456+K00827+K00789+K00811+K01011+K00016+K00026+K00827+K08967+K08967+K00928+K00058+K08967+K01738+K22207+K13034+K00797+K00549+K00547+K17398+K20772+K00016+K01738+K00058+K00827+K00827+K01739+K21456+K14454+K01244+K00789+K00549+K00558+K00826+K00789+K00826+K00558+…
Valine, leucine and isoleucine degradation	ko00280	227	tissues_transcript_10112;tissues_transcript_10308;tissues_transcript_10929;tissues_transcript_11136;tissues_transcript_11298;tissues_transcript_11820;tissues_transcript_12566;tissues_transcript_1283;tissues_transcript_12875;tissues_transcript_14242;tissues_transcript_15155;tissues_transcript_15185;tissues_transcript_15417;tissues_transcript_15802;tissues_transcript_16136;tissues_transcript_1618;t…	K05605+K00826+K00020+K01968+K00020+K01968+K01968+K00140+K00166+K00827+K00827+K00128+K01968+K00827+K00827+K01968+K00128+K00128+K00827+K05607+K00128+K00128+K00167+K00827+K00140+K00166+K00128+K14085+K00128+K07513+K00253+K00827+K00827+K05605+K00128+K00020+K00020+K00826+K07513+K00826+K00382+K01692+K00128+K01968+K00140+K01968+K01968+K09699+K14085+K00020+K18660+K00827+K05605+K00626+K01969+K01968+K00166+…
Valine, leucine and isoleucine biosynthesis	ko00290	63	tissues_transcript_10308;tissues_transcript_11626;tissues_transcript_12135;tissues_transcript_12179;tissues_transcript_12916;tissues_transcript_13173;tissues_transcript_16585;tissues_transcript_1783;tissues_transcript_25303;tissues_transcript_25805;tissues_transcript_26829;tissues_transcript_27043;tissues_transcript_27621;tissues_transcript_2856;tissues_transcript_30611;tissues_transcript_3090;ti…	K00826+K01704+K01704+K00053+K01754+K00053+K00053+K00053+K01649+K00053+K00826+K01703+K00826+K01687+K01653+K01649+K00053+K01704+K01653+K00053+K01649+K01653+K00053+K00053+K01687+K01649+K01653+K01703+K01754+K01649+K01653+K00826+K00053+K00053+K01687+K00826+K00826+K01652+K00052+K00826+K00052+K01649+K01754+K00053+K00053+K01687+K00053+K01653+K00053+K01653+K01649+K00053+K01687+K00826+K01649+K00052+K00826+…
Lysine biosynthesis	ko00300	21	tissues_transcript_2104;tissues_transcript_3522;tissues_transcript_36256;tissues_transcript_40602;tissues_transcript_41562;tissues_transcript_49663;tissues_transcript_53049;tissues_transcript_5654;tissues_transcript_6157;tissues_transcript_620;tissues_transcript_63017;tissues_transcript_63766;tissues_transcript_64981;tissues_transcript_6570;tissues_transcript_65708;tissues_transcript_66275;tissue…	K00928+K10206+K12524+K01778+K01778+K01778+K00003+K01586+K01714+K12524+K00133+K01586+K00293+K01714+K01714+K01586+K01586+K00215+K10206+K12524+K01778
Lysine degradation	ko00310	142	tissues_transcript_1173;tissues_transcript_12333;tissues_transcript_1333;tissues_transcript_14615;tissues_transcript_15185;tissues_transcript_16285;tissues_transcript_16718;tissues_transcript_17692;tissues_transcript_177;tissues_transcript_18377;tissues_transcript_18779;tissues_transcript_201;tissues_transcript_21706;tissues_transcript_21948;tissues_transcript_24516;tissues_transcript_24847;tissu…	K11420+K11422+K11420+K22748+K00128+K00128+K00128+K09188+K11422+K00128+K00128+K14157+K00128+K14085+K00128+K00658+K00128+K09188+K11426+K00382+K01692+K00128+K11420+K11430+K14085+K11420+K11423+K11422+K11423+K11422+K11423+K11433+K00626+K11430+K11430+K11420+K11430+K00128+K23700+K14157+K22748+K11422+K11426+K11430+K00128+K11420+K11420+K11422+K11422+K00658+K11420+K11426+K00128+K01692+K11420+K00306+K00658+…
Arginine and proline metabolism	ko00330	174	tissues_transcript_10191;tissues_transcript_11657;tissues_transcript_12282;tissues_transcript_12415;tissues_transcript_13621;tissues_transcript_1507;tissues_transcript_15185;tissues_transcript_16285;tissues_transcript_16718;tissues_transcript_16855;tissues_transcript_1820;tissues_transcript_18266;tissues_transcript_18377;tissues_transcript_18779;tissues_transcript_21706;tissues_transcript_21948;t…	K17839+K00472+K12657+K00797+K12657+K12657+K00128+K00128+K00128+K00472+K01583+K00811+K00128+K00128+K00128+K14085+K00797+K00128+K10536+K14454+K12657+K00128+K00294+K01426+K00472+K10536+K00797+K00128+K14085+K01476+K01583+K14454+K00797+K17839+K00128+K12657+K00294+K17839+K01426+K00472+K00128+K12657+K01426+K14454+K01426+K12657+K01476+K12251+K01426+K12657+K01426+K01611+K00128+K17839+K01583+K00819+K01611+…
Histidine metabolism	ko00340	70	tissues_transcript_11980;tissues_transcript_15074;tissues_transcript_15185;tissues_transcript_16285;tissues_transcript_16718;tissues_transcript_18377;tissues_transcript_18779;tissues_transcript_21706;tissues_transcript_21948;tissues_transcript_23189;tissues_transcript_24516;tissues_transcript_26517;tissues_transcript_28372;tissues_transcript_28696;tissues_transcript_29178;tissues_transcript_29705…	K00817+K01693+K00128+K00128+K00128+K00128+K00128+K00128+K14085+K01814+K00128+K00128+K00128+K01663+K00765+K14085+K01663+K00765+K00128+K00128+K00128+K00013+K00765+K00817+K00128+K00128+K00128+K19787+K01590+K14085+K00128+K19787+K00128+K00128+K00128+K00128+K00128+K14085+K01590+K14085+K00013+K14085+K00128+K00128+K00128+K00128+K14085+K11755+K00765+K00765+K00128+K11755+K14085+K00128+K01663+K00128+K00128+…
Tyrosine metabolism	ko00350	163	tissues_transcript_10395;tissues_transcript_10593;tissues_transcript_10607;tissues_transcript_11003;tissues_transcript_11073;tissues_transcript_11425;tissues_transcript_11980;tissues_transcript_12414;tissues_transcript_12776;tissues_transcript_13455;tissues_transcript_13541;tissues_transcript_1358;tissues_transcript_16242;tissues_transcript_1781;tissues_transcript_18266;tissues_transcript_18630;t…	K15849+K00121+K18606+K18606+K18857+K00001+K00817+K00121+K01800+K01800+K01800+K00276+K00276+K00001+K00811+K00121+K00276+K00121+K00457+K00121+K18606+K15849+K00121+K18857+K00457+K00001+K00001+K18857+K00001+K18857+K18857+K14454+K00121+K00422+K18857+K18857+K18857+K00451+K00457+K14454+K00001+K00121+K00276+K00276+K18857+K00001+K00001+K00121+K18857+K00457+K00815+K14454+K01557+K00276+K00815+K00121+K00121+…
Phenylalanine metabolism	ko00360	105	tissues_transcript_10395;tissues_transcript_10607;tissues_transcript_11003;tissues_transcript_11980;tissues_transcript_1358;tissues_transcript_16242;tissues_transcript_1767;tissues_transcript_18266;tissues_transcript_1948;tissues_transcript_20046;tissues_transcript_20839;tissues_transcript_2129;tissues_transcript_21454;tissues_transcript_25990;tissues_transcript_27238;tissues_transcript_28316;tis…	K15849+K18606+K18606+K00817+K00276+K00276+K10775+K00811+K00276+K00457+K18606+K15849+K00457+K14454+K01426+K01692+K00457+K14454+K00276+K00276+K00457+K01426+K00815+K01426+K14454+K01426+K10775+K01426+K00276+K00815+K01426+K01692+K07253+K00276+K00817+K01426+K00276+K01426+K00276+K00457+K01426+K01593+K01692+K07253+K00276+K01593+K14454+K18606+K00276+K00276+K14455+K14454+K03782+K01426+K14454+K14454+K01426+…
Tryptophan metabolism	ko00380	142	tissues_transcript_13247;tissues_transcript_15185;tissues_transcript_15367;tissues_transcript_16285;tissues_transcript_16718;tissues_transcript_18029;tissues_transcript_18377;tissues_transcript_18779;tissues_transcript_21490;tissues_transcript_21698;tissues_transcript_21706;tissues_transcript_21948;tissues_transcript_24516;tissues_transcript_24847;tissues_transcript_24922;tissues_transcript_25834…	K03781+K00128+K03781+K00128+K00128+K03781+K00128+K00128+K11816+K23947+K00128+K14085+K00128+K00658+K03781+K23947+K00128+K01426+K16903+K00382+K01692+K00128+K14085+K23947+K00626+K03781+K03781+K03781+K00128+K01426+K00128+K03781+K00837+K01426+K11816+K01426+K11816+K11816+K11816+K00658+K03781+K01426+K03781+K01426+K00128+K01692+K00658+K00128+K00658+K00128+K01426+K03781+K00128+K23947+K00837+K01426+K14085+…
Phenylalanine, tyrosine and tryptophan biosynthesis	ko00400	131	tissues_transcript_10395;tissues_transcript_11980;tissues_transcript_12186;tissues_transcript_13780;tissues_transcript_18266;tissues_transcript_18535;tissues_transcript_19549;tissues_transcript_19833;tissues_transcript_20712;tissues_transcript_20762;tissues_transcript_2129;tissues_transcript_21390;tissues_transcript_22700;tissues_transcript_24479;tissues_transcript_24757;tissues_transcript_25735;…	K15849+K00817+K00891+K01626+K00811+K01609+K13832+K00766+K01696+K01695+K15849+K01850+K01695+K13832+K01626+K01695+K14454+K01736+K01735+K01695+K00891+K00800+K01609+K00891+K15227+K01658+K01735+K14454+K01609+K01850+K15227+K01695+K01695+K01658+K01657+K01696+K00815+K00800+K14454+K13832+K01626+K01626+K01736+K01736+K13832+K00815+K01736+K00891+K01626+K00817+K01658+K01695+K01626+K00800+K00800+K01626+K01657+…
Benzoxazinoid biosynthesis	ko00402	22	tissues_transcript_14448;tissues_transcript_27305;tissues_transcript_27631;tissues_transcript_30208;tissues_transcript_33836;tissues_transcript_35449;tissues_transcript_41397;tissues_transcript_42621;tissues_transcript_48878;tissues_transcript_52799;tissues_transcript_53270;tissues_transcript_53417;tissues_transcript_56165;tissues_transcript_60247;tissues_transcript_60558;tissues_transcript_62111…	K13229+K13229+K13227+K13229+K13229+K13229+K13229+K13229+K13229+K13229+K13229+K13227+K13229+K13229+K13229+K13229+K13229+K13229+K13229+K13229+K13229+K13229
beta-Alanine metabolism	ko00410	167	tissues_transcript_10112;tissues_transcript_10191;tissues_transcript_10353;tissues_transcript_1283;tissues_transcript_1358;tissues_transcript_15185;tissues_transcript_16242;tissues_transcript_16285;tissues_transcript_16323;tissues_transcript_16718;tissues_transcript_17697;tissues_transcript_17772;tissues_transcript_18377;tissues_transcript_18779;tissues_transcript_1948;tissues_transcript_20962;ti…	K05605+K17839+K00232+K00140+K00276+K00128+K00276+K00128+K01918+K00128+K01580+K00232+K00128+K00128+K00276+K00140+K00128+K14085+K00232+K01578+K00128+K00232+K01580+K01464+K00232+K05605+K00128+K01692+K00128+K00140+K14085+K01578+K17839+K00276+K05605+K00276+K01580+K00232+K01578+K00128+K17839+K00232+K00128+K01578+K00232+K05605+K00276+K01464+K00128+K01692+K17839+K00276+K01431+K00128+K00128+K00128+K00276+…
Taurine and hypotaurine metabolism	ko00430	13	tissues_transcript_17697;tissues_transcript_25541;tissues_transcript_31963;tissues_transcript_42176;tissues_transcript_4988;tissues_transcript_52226;tissues_transcript_56219;tissues_transcript_58815;tissues_transcript_61302;tissues_transcript_66686;tissues_transcript_68017;tissues_transcript_73062;tissues_transcript_8382;	K01580+K01580+K01580+K18592+K01580+K01580+K01580+K01580+K01580+K18592+K18592+K18592+K01580
Phosphonate and phosphinate metabolism	ko00440	14	tissues_transcript_28281;tissues_transcript_30497;tissues_transcript_31921;tissues_transcript_43582;tissues_transcript_4732;tissues_transcript_4899;tissues_transcript_57345;tissues_transcript_5905;tissues_transcript_5996;tissues_transcript_60702;tissues_transcript_63904;tissues_transcript_72707;tissues_transcript_74168;tissues_transcript_7961;	K00993+K00967+K00993+K00967+K00967+K00967+K00967+K00993+K00993+K00967+K00968+K00993+K00967+K00967
Selenocompound metabolism	ko00450	64	tissues_transcript_10250;tissues_transcript_10840;tissues_transcript_1194;tissues_transcript_1303;tissues_transcript_14917;tissues_transcript_16554;tissues_transcript_17733;tissues_transcript_21373;tissues_transcript_24593;tissues_transcript_25631;tissues_transcript_26200;tissues_transcript_26974;tissues_transcript_27687;tissues_transcript_27903;tissues_transcript_29046;tissues_transcript_29684;t…	K00549+K13811+K00549+K00549+K01761+K00384+K00384+K13811+K00549+K01739+K00549+K11717+K00384+K00549+K01760+K13811+K13811+K00958+K22182+K01739+K00549+K01739+K01874+K00549+K13811+K01761+K01760+K01874+K00549+K00384+K01739+K01760+K01760+K08247+K13811+K01874+K00384+K00549+K01739+K00384+K00384+K13811+K01760+K01760+K01760+K00384+K00384+K00384+K00384+K01760+K11717+K01760+K13811+K01874+K13811+K01761+K01760+…
Cyanoamino acid metabolism	ko00460	182	tissues_transcript_10350;tissues_transcript_11700;tissues_transcript_13677;tissues_transcript_14757;tissues_transcript_15234;tissues_transcript_17179;tissues_transcript_1950;tissues_transcript_21712;tissues_transcript_23222;tissues_transcript_24013;tissues_transcript_24546;tissues_transcript_24577;tissues_transcript_24756;tissues_transcript_24809;tissues_transcript_25614;tissues_transcript_25696;…	K13051+K01188+K01455+K00600+K00600+K01188+K00600+K20802+K13034+K05350+K01188+K05350+K01188+K05349+K01188+K01455+K01188+K05349+K01188+K05349+K05349+K00600+K00600+K01188+K00600+K13032+K01188+K01188+K05349+K00600+K01188+K01188+K01188+K05349+K01188+K01188+K01188+K01188+K00600+K01188+K01188+K05349+K01188+K00600+K13033+K01188+K01188+K01188+K05349+K01188+K05349+K13035+K13034+K00600+K01188+K20802+K00600+…
Glutathione metabolism	ko00480	238	tissues_transcript_10291;tissues_transcript_10527;tissues_transcript_11739;tissues_transcript_11881;tissues_transcript_12415;tissues_transcript_12586;tissues_transcript_12863;tissues_transcript_13014;tissues_transcript_13223;tissues_transcript_13335;tissues_transcript_13342;tissues_transcript_13355;tissues_transcript_13498;tissues_transcript_13566;tissues_transcript_13669;tissues_transcript_14059…	K00383+K00383+K22596+K00799+K00797+K00434+K00799+K00799+K00799+K00799+K21888+K21888+K00799+K00799+K00799+K00799+K00033+K00799+K00799+K00799+K00033+K01469+K00799+K00799+K00799+K00799+K11188+K00383+K00434+K00434+K11188+K00432+K00031+K21456+K00434+K00799+K00031+K00432+K00799+K22596+K00799+K00799+K00799+K00799+K00799+K00797+K00799+K00799+K00031+K21456+K00799+K01256+K00383+K00799+K00434+K00797+K01255+…
Starch and sucrose metabolism	ko00500	536	tissues_transcript_10189;tissues_transcript_10344;tissues_transcript_10522;tissues_transcript_10765;tissues_transcript_1166;tissues_transcript_11700;tissues_transcript_1171;tissues_transcript_13623;tissues_transcript_1376;tissues_transcript_13816;tissues_transcript_1394;tissues_transcript_1413;tissues_transcript_14594;tissues_transcript_1530;tissues_transcript_15582;tissues_transcript_16337;tissu…	K00847+K01179+K00847+K00847+K00703+K01188+K00695+K00847+K01176+K00847+K00703+K01214+K19891+K00700+K01176+K01214+K00847+K01176+K19891+K01188+K01193+K01179+K16055+K19892+K19893+K00963+K00844+K16055+K00700+K05350+K00695+K01513+K00705+K01176+K01835+K01188+K01193+K05350+K00695+K01188+K05349+K00975+K18447+K01810+K00975+K00703+K00700+K01177+K01810+K01810+K01188+K16055+K01087+K01177+K01188+K01176+K05349+…
N-Glycan biosynthesis	ko00510	120	tissues_transcript_10435;tissues_transcript_11194;tissues_transcript_12761;tissues_transcript_13108;tissues_transcript_1370;tissues_transcript_1678;tissues_transcript_1721;tissues_transcript_17523;tissues_transcript_18561;tissues_transcript_19031;tissues_transcript_19506;tissues_transcript_20189;tissues_transcript_24323;tissues_transcript_24487;tissues_transcript_24760;tissues_transcript_25055;ti…	K03846+K00729+K07252+K03849+K07151+K07151+K23741+K12668+K03849+K07151+K07432+K07432+K05546+K00729+K00729+K09659+K01228+K12668+K12667+K05546+K01001+K00726+K00902+K23741+K05546+K12345+K03849+K00726+K00726+K12666+K03846+K12670+K01231+K00726+K03846+K00726+K12670+K00729+K03846+K12667+K01231+K03843+K12667+K03850+K12345+K12666+K00737+K05546+K00902+K00737+K05546+K00902+K05546+K05546+K01230+K00737+K12670+…
Other glycan degradation	ko00511	94	tissues_transcript_14721;tissues_transcript_1497;tissues_transcript_16878;tissues_transcript_16976;tissues_transcript_1724;tissues_transcript_1759;tissues_transcript_22123;tissues_transcript_24361;tissues_transcript_24804;tissues_transcript_25260;tissues_transcript_26238;tissues_transcript_26482;tissues_transcript_28299;tissues_transcript_28697;tissues_transcript_29818;tissues_transcript_30167;ti…	K01191+K12309+K12309+K12373+K12309+K12309+K01191+K01191+K12309+K12309+K12373+K01191+K01206+K01190+K12309+K12373+K12309+K01190+K01191+K12309+K01191+K12309+K12309+K12309+K12309+K12309+K12309+K12309+K01191+K12309+K12309+K01206+K12309+K12309+K12309+K01191+K12309+K17108+K12309+K01191+K12309+K01191+K01191+K12309+K12309+K01191+K12309+K12309+K15923+K15923+K01191+K01206+K15923+K01227+K01191+K01227+K12309+…
Various types of N-glycan biosynthesis	ko00513	82	tissues_transcript_10435;tissues_transcript_1370;tissues_transcript_1678;tissues_transcript_16976;tissues_transcript_1721;tissues_transcript_17523;tissues_transcript_18881;tissues_transcript_19031;tissues_transcript_19506;tissues_transcript_20189;tissues_transcript_24895;tissues_transcript_25751;tissues_transcript_25905;tissues_transcript_26238;tissues_transcript_27158;tissues_transcript_2728;tis…	K03846+K07151+K07151+K12373+K23741+K12668+K14412+K07151+K07432+K07432+K00753+K12668+K12667+K12373+K00726+K23741+K00726+K00726+K12666+K03846+K12373+K12670+K01231+K00726+K03846+K00726+K12670+K00753+K03846+K12667+K01231+K03843+K12667+K12666+K00753+K01230+K12670+K00753+K12670+K12666+K00726+K00726+K01230+K00726+K12669+K03844+K07432+K00726+K12667+K00726+K14412+K12667+K00736+K01230+K03842+K01231+K00726+…
Other types of O-glycan biosynthesis	ko00514	68	tissues_transcript_10038;tissues_transcript_10230;tissues_transcript_10336;tissues_transcript_11370;tissues_transcript_11691;tissues_transcript_11749;tissues_transcript_12874;tissues_transcript_14657;tissues_transcript_15136;tissues_transcript_15601;tissues_transcript_17232;tissues_transcript_22586;tissues_transcript_22587;tissues_transcript_24337;tissues_transcript_25953;tissues_transcript_27389…	K20782+K20782+K20784+K20784+K20784+K20784+K20784+K20784+K20782+K20784+K18134+K20782+K20782+K20783+K20784+K20782+K09667+K09667+K20784+K09667+K20782+K20784+K20784+K18134+K20782+K00728+K20781+K20784+K09667+K20782+K18134+K20781+K20784+K20782+K03691+K20782+K20782+K20784+K09667+K20784+K20783+K09667+K09667+K20784+K20782+K20783+K20781+K20782+K20782+K09667+K09667+K20784+K20781+K00728+K09667+K20782+K20784+…
Mannose type O-glycan biosynthesis	ko00515	2	tissues_transcript_35744;tissues_transcript_66447;	K00728+K00728
Amino sugar and nucleotide sugar metabolism	ko00520	396	tissues_transcript_10189;tissues_transcript_10340;tissues_transcript_10362;tissues_transcript_10436;tissues_transcript_10522;tissues_transcript_1055;tissues_transcript_10765;tissues_transcript_10797;tissues_transcript_11033;tissues_transcript_11050;tissues_transcript_11372;tissues_transcript_12622;tissues_transcript_12835;tissues_transcript_12846;tissues_transcript_13000;tissues_transcript_13003;…	K00847+K08678+K20547+K20547+K00847+K13648+K00847+K20547+K12451+K08678+K17497+K01183+K01183+K01183+K20547+K01183+K01183+K20547+K00847+K00847+K01183+K12446+K01183+K13648+K15920+K01209+K12450+K13648+K08679+K12450+K00847+K16190+K12373+K01183+K13648+K13648+K01183+K00326+K15920+K01183+K15920+K17497+K00963+K00844+K01209+K13648+K01209+K00326+K01835+K00770+K01183+K13379+K20547+K00975+K01810+K20547+K00975+…
Glycosaminoglycan degradation	ko00531	77	tissues_transcript_1163;tissues_transcript_1497;tissues_transcript_16878;tissues_transcript_16976;tissues_transcript_1724;tissues_transcript_1759;tissues_transcript_20534;tissues_transcript_24804;tissues_transcript_25260;tissues_transcript_26238;tissues_transcript_28298;tissues_transcript_29818;tissues_transcript_30167;tissues_transcript_30200;tissues_transcript_30977;tissues_transcript_31643;tis…	K01205+K12309+K12309+K12373+K12309+K12309+K10532+K12309+K12309+K12373+K01205+K12309+K12373+K12309+K12309+K10532+K12309+K12309+K12309+K07964+K12309+K12309+K12309+K12309+K12309+K12309+K12309+K12309+K12309+K12309+K07964+K12309+K01205+K12309+K12309+K12309+K07964+K10532+K12309+K12309+K01205+K10532+K01205+K07964+K12309+K12309+K12309+K10532+K12309+K12309+K12309+K12309+K01205+K12373+K12309+K12309+K12309+…
Glycerolipid metabolism	ko00561	223	tissues_transcript_10032;tissues_transcript_10067;tissues_transcript_10098;tissues_transcript_10587;tissues_transcript_10890;tissues_transcript_10934;tissues_transcript_11131;tissues_transcript_11155;tissues_transcript_12599;tissues_transcript_14649;tissues_transcript_15185;tissues_transcript_1553;tissues_transcript_1581;tissues_transcript_16013;tissues_transcript_16285;tissues_transcript_16612;t…	K14674+K00002+K00679+K00901+K00002+K00655+K01054+K13508+K06119+K09480+K00128+K06119+K09480+K07407+K00128+K00002+K00128+K00002+K07407+K15728+K00679+K14674+K15728+K00128+K00128+K00679+K00128+K14085+K00002+K00128+K00679+K15728+K21362+K00901+K00901+K00128+K07407+K13506+K03715+K21362+K18693+K11155+K15728+K00128+K21362+K07407+K15728+K14085+K00679+K13523+K09480+K00901+K00901+K09480+K00679+K00128+K06119+…
Inositol phosphate metabolism	ko00562	211	tissues_transcript_10409;tissues_transcript_10764;tissues_transcript_1113;tissues_transcript_1136;tissues_transcript_1191;tissues_transcript_11986;tissues_transcript_12074;tissues_transcript_12804;tissues_transcript_1283;tissues_transcript_12935;tissues_transcript_13058;tissues_transcript_15398;tissues_transcript_16075;tissues_transcript_16164;tissues_transcript_17782;tissues_transcript_18245;tis…	K00469+K01803+K00889+K00889+K01858+K01803+K10572+K01092+K00140+K01803+K00913+K01099+K24221+K01092+K03103+K01092+K01803+K01114+K21797+K00140+K01092+K01803+K01110+K18081+K00888+K01099+K18081+K00921+K10572+K00913+K01765+K00921+K01092+K01765+K05857+K00921+K01092+K00140+K01114+K18081+K01858+K01110+K01803+K21797+K01114+K01092+K00889+K00921+K05857+K05857+K19801+K19801+K05857+K05857+K01803+K01858+K00889+…
Glycosylphosphatidylinositol (GPI)-anchor biosynthesis	ko00563	68	tissues_transcript_18577;tissues_transcript_24091;tissues_transcript_24627;tissues_transcript_2467;tissues_transcript_25232;tissues_transcript_25234;tissues_transcript_26144;tissues_transcript_26611;tissues_transcript_26828;tissues_transcript_26859;tissues_transcript_26902;tissues_transcript_27338;tissues_transcript_27508;tissues_transcript_27694;tissues_transcript_27991;tissues_transcript_31585;…	K03860+K07542+K05284+K05289+K07542+K03857+K07541+K07542+K05284+K05286+K07542+K07541+K05285+K07541+K05290+K07542+K05285+K05292+K03859+K05287+K03860+K05287+K11001+K07542+K07542+K05284+K03434+K03860+K03857+K07541+K05290+K05293+K07542+K03860+K05286+K07542+K03857+K05287+K03857+K07542+K07542+K05293+K05292+K05294+K03857+K03861+K05284+K03858+K05287+K05294+K05288+K03858+K07541+K03857+K05285+K05289+K03860+…
Glycerophospholipid metabolism	ko00564	215	tissues_transcript_10007;tissues_transcript_10032;tissues_transcript_10587;tissues_transcript_1093;tissues_transcript_10934;tissues_transcript_11155;tissues_transcript_1134;tissues_transcript_11984;tissues_transcript_12379;tissues_transcript_1329;tissues_transcript_13409;tissues_transcript_14077;tissues_transcript_14613;tissues_transcript_155;tissues_transcript_161;tissues_transcript_17745;tissue…	K00006+K14674+K00901+K01115+K00655+K13508+K01126+K14156+K06130+K01115+K01115+K06129+K01115+K01115+K01115+K15728+K01115+K14674+K15728+K01114+K15728+K00901+K06130+K01115+K01613+K00901+K00006+K01047+K13506+K18693+K22389+K00981+K15728+K00993+K01114+K15728+K06130+K00981+K16818+K13523+K00967+K22389+K00901+K00901+K01114+K01115+K01613+K00006+K01115+K00993+K01126+K01115+K00006+K01115+K14156+K00111+K22389+…
Ether lipid metabolism	ko00565	69	tissues_transcript_10032;tissues_transcript_1093;tissues_transcript_1329;tissues_transcript_13409;tissues_transcript_14613;tissues_transcript_155;tissues_transcript_161;tissues_transcript_1805;tissues_transcript_18095;tissues_transcript_20908;tissues_transcript_26104;tissues_transcript_27042;tissues_transcript_28281;tissues_transcript_29232;tissues_transcript_30920;tissues_transcript_31355;tissue…	K14674+K01115+K01115+K01115+K01115+K01115+K01115+K01115+K14674+K01114+K01115+K01047+K00993+K01114+K01062+K01114+K01115+K01115+K00993+K01115+K01115+K13519+K01115+K01115+K01115+K01115+K01115+K01115+K01115+K01114+K01114+K01115+K01115+K01062+K01114+K13519+K14674+K13510+K01114+K01114+K13510+K01115+K01115+K01115+K01115+K01115+K01062+K00993+K00993+K13510+K01062+K01115+K01115+K01115+K01115+K01114+K01062+…
Arachidonic acid metabolism	ko00590	54	tissues_transcript_10032;tissues_transcript_10707;tissues_transcript_11539;tissues_transcript_13553;tissues_transcript_15027;tissues_transcript_15242;tissues_transcript_15385;tissues_transcript_15826;tissues_transcript_15961;tissues_transcript_16607;tissues_transcript_18095;tissues_transcript_18379;tissues_transcript_18608;tissues_transcript_24030;tissues_transcript_24507;tissues_transcript_27042…	K14674+K08726+K08726+K15730+K15730+K08726+K08726+K05309+K15730+K00432+K14674+K00432+K08726+K01254+K01254+K01047+K08726+K00432+K01254+K00432+K15730+K08726+K01254+K00079+K01254+K08726+K18592+K00432+K01254+K00432+K08726+K08726+K08726+K14674+K08726+K07425+K05309+K01254+K01254+K00432+K08726+K05309+K08726+K08726+K18592+K18592+K15730+K01254+K18592+K08726+K08726+K08726+K08726+K08726
Linoleic acid metabolism	ko00591	39	tissues_transcript_10032;tissues_transcript_18095;tissues_transcript_21825;tissues_transcript_25552;tissues_transcript_26327;tissues_transcript_27042;tissues_transcript_29451;tissues_transcript_29999;tissues_transcript_36611;tissues_transcript_36675;tissues_transcript_37503;tissues_transcript_38452;tissues_transcript_41155;tissues_transcript_43780;tissues_transcript_46158;tissues_transcript_46844…	K14674+K14674+K00454+K00454+K00454+K01047+K00454+K00454+K00454+K00454+K15718+K15718+K00454+K15718+K15718+K00454+K14674+K15718+K15718+K15718+K00454+K00454+K00454+K00454+K15718+K00454+K00454+K15718+K15718+K00454+K00454+K15718+K15718+K00454+K00454+K00454+K15718+K15718+K00454
alpha-Linolenic acid metabolism	ko00592	189	tissues_transcript_10032;tissues_transcript_10078;tissues_transcript_10353;tissues_transcript_10871;tissues_transcript_11073;tissues_transcript_11116;tissues_transcript_11282;tissues_transcript_13016;tissues_transcript_13489;tissues_transcript_13618;tissues_transcript_13722;tissues_transcript_1473;tissues_transcript_1613;tissues_transcript_16268;tissues_transcript_1646;tissues_transcript_1754;tis…	K14674+K00224+K00232+K10525+K18857+K00224+K10525+K10525+K05894+K10525+K00224+K10527+K10527+K10529+K10527+K10527+K00232+K14674+K10526+K10526+K10528+K18857+K00454+K00232+K10527+K07513+K18857+K18857+K00232+K18857+K00454+K10525+K00232+K00454+K01047+K07513+K18857+K22389+K18857+K00224+K05894+K18857+K10527+K05894+K00454+K10525+K00454+K16818+K05894+K22389+K10529+K05894+K10525+K00232+K18857+K18857+K22389+…
Sphingolipid metabolism	ko00600	121	tissues_transcript_10432;tissues_transcript_10603;tissues_transcript_1127;tissues_transcript_12082;tissues_transcript_1260;tissues_transcript_1274;tissues_transcript_14492;tissues_transcript_1497;tissues_transcript_15473;tissues_transcript_16013;tissues_transcript_16878;tissues_transcript_16897;tissues_transcript_1724;tissues_transcript_1759;tissues_transcript_24661;tissues_transcript_24804;tissu…	K04708+K12349+K12349+K12382+K00654+K12349+K01634+K12309+K04708+K07407+K12309+K07407+K12309+K12309+K04713+K12309+K12309+K07407+K01634+K01190+K07407+K12309+K12309+K01190+K12309+K04710+K12309+K04711+K01634+K07407+K04718+K12309+K12309+K00654+K12309+K01634+K12349+K12309+K12309+K07407+K12309+K12309+K12309+K00654+K00654+K12309+K12309+K12309+K12309+K04708+K12349+K17108+K12309+K12349+K01634+K01634+K12309+…
Glycosphingolipid biosynthesis - lacto and neolacto series	ko00601	1	tissues_transcript_1927;	K01988
Glycosphingolipid biosynthesis - globo and isoglobo series	ko00603	21	tissues_transcript_16013;tissues_transcript_16897;tissues_transcript_16976;tissues_transcript_1927;tissues_transcript_26238;tissues_transcript_26951;tissues_transcript_29406;tissues_transcript_30167;tissues_transcript_34903;tissues_transcript_38602;tissues_transcript_49125;tissues_transcript_50941;tissues_transcript_51193;tissues_transcript_51406;tissues_transcript_56192;tissues_transcript_63415;…	K07407+K07407+K12373+K01988+K12373+K07407+K07407+K12373+K07407+K07407+K07407+K07407+K07407+K07407+K07407+K12373+K07407+K12373+K07407+K07407+K07407
Glycosphingolipid biosynthesis - ganglio series	ko00604	55	tissues_transcript_1497;tissues_transcript_16878;tissues_transcript_16976;tissues_transcript_1724;tissues_transcript_1759;tissues_transcript_24804;tissues_transcript_25260;tissues_transcript_26238;tissues_transcript_29818;tissues_transcript_30167;tissues_transcript_30200;tissues_transcript_30977;tissues_transcript_34011;tissues_transcript_36177;tissues_transcript_36882;tissues_transcript_38048;ti…	K12309+K12309+K12373+K12309+K12309+K12309+K12309+K12373+K12309+K12373+K12309+K12309+K12309+K12309+K12309+K12309+K12309+K12309+K12309+K12309+K12309+K12309+K12309+K12309+K12309+K12309+K12309+K12309+K12309+K12309+K12309+K12309+K12309+K12309+K12309+K12309+K12309+K12309+K12373+K12309+K12309+K12309+K12309+K12309+K12373+K12309+K12309+K12309+K12309+K12309+K12309+K12309+K12309+K12309+K12309
Pyruvate metabolism	ko00620	319	tissues_transcript_10076;tissues_transcript_10648;tissues_transcript_11179;tissues_transcript_11701;tissues_transcript_12148;tissues_transcript_12387;tissues_transcript_13227;tissues_transcript_13640;tissues_transcript_14227;tissues_transcript_14524;tissues_transcript_15117;tissues_transcript_15185;tissues_transcript_15576;tissues_transcript_15896;tissues_transcript_16234;tissues_transcript_16278…	K00162+K02160+K01759+K01595+K01069+K01069+K00873+K01759+K00029+K01595+K01962+K00128+K01759+K01962+K01759+K01679+K00128+K01895+K00128+K01759+K00128+K01759+K00128+K01610+K00016+K00026+K01963+K01610+K00029+K01895+K00028+K00029+K00128+K14085+K00028+K00029+K00873+K00128+K01610+K00161+K01963+K00873+K01006+K00016+K00028+K01649+K01595+K00873+K00873+K00128+K00873+K00029+K00627+K00029+K00873+K01961+K00382+…
Glyoxylate and dicarboxylate metabolism	ko00630	267	tissues_transcript_10069;tissues_transcript_11210;tissues_transcript_11540;tissues_transcript_11598;tissues_transcript_11994;tissues_transcript_12028;tissues_transcript_12141;tissues_transcript_13247;tissues_transcript_13677;tissues_transcript_1390;tissues_transcript_14757;tissues_transcript_1521;tissues_transcript_15234;tissues_transcript_15367;tissues_transcript_15459;tissues_transcript_1611;ti…	K19269+K19269+K01647+K22133+K15893+K22133+K01915+K03781+K01455+K01915+K00600+K15919+K00600+K03781+K01602+K22133+K01895+K01681+K03781+K01602+K18121+K00600+K22133+K00026+K01601+K01601+K01895+K01602+K11517+K00830+K19269+K01601+K22133+K15919+K00605+K03781+K01455+K22133+K01915+K02437+K22133+K01915+K01601+K00284+K11517+K01601+K00600+K00382+K00600+K00026+K15919+K01601+K00600+K00284+K01915+K01681+K22133+…
Propanoate metabolism	ko00640	143	tissues_transcript_10112;tissues_transcript_10353;tissues_transcript_10648;tissues_transcript_1283;tissues_transcript_12875;tissues_transcript_15117;tissues_transcript_15896;tissues_transcript_1643;tissues_transcript_17772;tissues_transcript_1800;tissues_transcript_18262;tissues_transcript_19275;tissues_transcript_19993;tissues_transcript_20379;tissues_transcript_20962;tissues_transcript_2114;tis…	K05605+K00232+K02160+K00140+K00166+K01962+K01962+K01895+K00232+K18369+K01900+K00167+K00016+K01963+K00140+K01895+K00166+K00232+K01578+K01963+K00016+K00232+K00232+K05605+K01961+K00382+K01692+K00140+K09699+K01578+K11262+K18369+K05605+K00626+K00232+K01578+K00166+K11262+K00166+K00232+K01961+K01578+K00232+K05605+K01963+K18369+K00167+K01963+K01692+K01908+K01895+K01899+K23146+K11262+K11262+K01692+K00232+…
Butanoate metabolism	ko00650	77	tissues_transcript_11906;tissues_transcript_17697;tissues_transcript_19210;tissues_transcript_20019;tissues_transcript_25541;tissues_transcript_26524;tissues_transcript_27288;tissues_transcript_28316;tissues_transcript_29683;tissues_transcript_30611;tissues_transcript_30884;tissues_transcript_31348;tissues_transcript_31963;tissues_transcript_33337;tissues_transcript_3334;tissues_transcript_34355;…	K00109+K01580+K18121+K17761+K01580+K17761+K17761+K01692+K17761+K01653+K17761+K00626+K01580+K01653+K01913+K01640+K01913+K17761+K01640+K01653+K01913+K01913+K01692+K01653+K17761+K17761+K17761+K01640+K01913+K17761+K01653+K01692+K01640+K00626+K17761+K00135+K17761+K01580+K17761+K01641+K16871+K01580+K01652+K18121+K17761+K01913+K01640+K16871+K17761+K01692+K01913+K01580+K17761+K17761+K17761+K17761+K17761+…
C5-Branched dibasic acid metabolism	ko00660	16	tissues_transcript_11626;tissues_transcript_12135;tissues_transcript_27043;tissues_transcript_30611;tissues_transcript_32298;tissues_transcript_33337;tissues_transcript_36359;tissues_transcript_39289;tissues_transcript_3949;tissues_transcript_43409;tissues_transcript_52321;tissues_transcript_54058;tissues_transcript_58538;tissues_transcript_61345;tissues_transcript_63961;tissues_transcript_6596;	K01704+K01704+K01703+K01653+K01704+K01653+K01653+K01653+K01703+K01653+K01652+K00052+K00052+K01653+K01653+K00052
One carbon pool by folate	ko00670	65	tissues_transcript_10803;tissues_transcript_11527;tissues_transcript_13145;tissues_transcript_14757;tissues_transcript_15234;tissues_transcript_16666;tissues_transcript_16736;tissues_transcript_1950;tissues_transcript_2057;tissues_transcript_2365;tissues_transcript_24894;tissues_transcript_25382;tissues_transcript_25915;tissues_transcript_27638;tissues_transcript_27812;tissues_transcript_2784;tis…	K00288+K00288+K00288+K00600+K00600+K00602+K01938+K00600+K01938+K01938+K00605+K00288+K00604+K00600+K00600+K00297+K00288+K00297+K00600+K00600+K00288+K00602+K00604+K00288+K00602+K00600+K00600+K00601+K00600+K01938+K13998+K00600+K00600+K01934+K00604+K00605+K00602+K00600+K00288+K01934+K00600+K13998+K00600+K00288+K00600+K00600+K00600+K00600+K00297+K00600+K01433+K01938+K00600+K00600+K13998+K00600+K00288+…
Carbon fixation in photosynthetic organisms	ko00710	276	tissues_transcript_10273;tissues_transcript_10414;tissues_transcript_10764;tissues_transcript_11701;tissues_transcript_11986;tissues_transcript_12919;tissues_transcript_12935;tissues_transcript_13209;tissues_transcript_13919;tissues_transcript_14227;tissues_transcript_1443;tissues_transcript_14524;tissues_transcript_15358;tissues_transcript_15459;tissues_transcript_16869;tissues_transcript_17266;…	K01783+K01807+K01803+K01595+K01803+K03841+K01803+K03841+K01807+K00029+K00615+K01595+K03841+K01602+K00134+K01100+K01803+K01602+K01610+K00615+K00927+K00026+K01601+K01783+K01610+K01601+K01623+K00029+K01602+K01803+K00028+K00029+K01623+K01623+K05298+K00028+K00029+K00615+K01610+K01601+K01006+K00028+K01595+K01623+K14454+K00927+K00855+K01624+K01807+K01601+K00029+K00029+K01601+K01623+K00026+K00029+K01601+…
Thiamine metabolism	ko00730	100	tissues_transcript_12030;tissues_transcript_12514;tissues_transcript_12598;tissues_transcript_13062;tissues_transcript_139;tissues_transcript_13976;tissues_transcript_1460;tissues_transcript_15233;tissues_transcript_15406;tissues_transcript_15852;tissues_transcript_15983;tissues_transcript_16926;tissues_transcript_17051;tissues_transcript_17961;tissues_transcript_19178;tissues_transcript_20434;ti…	K00939+K01662+K22911+K01662+K22911+K03147+K01662+K03147+K00939+K03147+K00939+K20896+K03146+K00939+K20896+K06949+K01662+K00939+K14153+K03146+K00939+K03147+K03146+K00939+K03147+K06928+K22911+K01662+K01662+K03147+K22911+K22911+K00939+K03146+K00939+K04487+K20896+K00949+K03146+K00949+K01662+K22911+K22911+K04487+K04487+K00939+K04487+K04487+K04487+K03146+K06949+K01662+K00939+K03146+K20896+K00939+K03146+…
Riboflavin metabolism	ko00740	50	tissues_transcript_10463;tissues_transcript_12533;tissues_transcript_14254;tissues_transcript_20321;tissues_transcript_21073;tissues_transcript_24117;tissues_transcript_24473;tissues_transcript_27666;tissues_transcript_28436;tissues_transcript_30355;tissues_transcript_30821;tissues_transcript_3107;tissues_transcript_31249;tissues_transcript_31297;tissues_transcript_33913;tissues_transcript_3509;t…	K11752+K20884+K00794+K14652+K11752+K01513+K20884+K14652+K14652+K01513+K14652+K14652+K20884+K00794+K14652+K14652+K00794+K20884+K00953+K14652+K14379+K11752+K01513+K22912+K01513+K01513+K00793+K22912+K20884+K11752+K22912+K00953+K20884+K01513+K20884+K01513+K14652+K01513+K20884+K20884+K14652+K01513+K14652+K14379+K01513+K14652+K14652+K11752+K11752+K22912
Vitamin B6 metabolism	ko00750	42	tissues_transcript_10165;tissues_transcript_10300;tissues_transcript_12619;tissues_transcript_15380;tissues_transcript_17158;tissues_transcript_19209;tissues_transcript_20103;tissues_transcript_25504;tissues_transcript_25673;tissues_transcript_25994;tissues_transcript_26263;tissues_transcript_28500;tissues_transcript_30302;tissues_transcript_34546;tissues_transcript_35043;tissues_transcript_35767…	K06215+K05275+K05275+K06215+K06215+K01733+K06215+K05275+K05275+K05275+K06215+K01733+K05275+K05275+K06215+K01733+K00831+K01733+K05275+K06215+K05275+K05275+K00868+K05275+K00275+K00831+K05275+K05275+K05275+K05275+K01733+K05275+K05275+K05275+K05275+K01733+K05275+K08681+K05275+K05275+K08681+K23998
Nicotinate and nicotinamide metabolism	ko00760	85	tissues_transcript_12150;tissues_transcript_13568;tissues_transcript_1626;tissues_transcript_16994;tissues_transcript_1715;tissues_transcript_24117;tissues_transcript_25991;tissues_transcript_26118;tissues_transcript_26201;tissues_transcript_27122;tissues_transcript_27604;tissues_transcript_28077;tissues_transcript_28479;tissues_transcript_30355;tissues_transcript_3222;tissues_transcript_33785;ti…	K03426+K03517+K01950+K00858+K01950+K01513+K00858+K11416+K00763+K00767+K01081+K11416+K11416+K01513+K00763+K00278+K00763+K03787+K01240+K11414+K03517+K01240+K11416+K01240+K00858+K01081+K00858+K03426+K01240+K00278+K00858+K00858+K01513+K01240+K11416+K11416+K00278+K11416+K01513+K00135+K11411+K06210+K00858+K03426+K01240+K00858+K01513+K03517+K18551+K00858+K00858+K01950+K00767+K00858+K01081+K01081+K03517+…
Pantothenate and CoA biosynthesis	ko00770	151	tissues_transcript_10191;tissues_transcript_10308;tissues_transcript_12179;tissues_transcript_13173;tissues_transcript_14628;tissues_transcript_15185;tissues_transcript_16285;tissues_transcript_16323;tissues_transcript_16585;tissues_transcript_16718;tissues_transcript_1783;tissues_transcript_18377;tissues_transcript_18779;tissues_transcript_19808;tissues_transcript_21706;tissues_transcript_22548;…	K17839+K00826+K00053+K00053+K09680+K00128+K00128+K01918+K00053+K00128+K00053+K00128+K00128+K09680+K00128+K01922+K01513+K00128+K01464+K00053+K00128+K00826+K09680+K00826+K00128+K01687+K09680+K01513+K01653+K17839+K00053+K01653+K09680+K00053+K00128+K09680+K09680+K17839+K02201+K00128+K06133+K01653+K00053+K02201+K00053+K01922+K09680+K01687+K01464+K00128+K17839+K01653+K09680+K01431+K00128+K00128+K00128+…
Biotin metabolism	ko00780	33	tissues_transcript_10911;tissues_transcript_12002;tissues_transcript_13230;tissues_transcript_15436;tissues_transcript_19726;tissues_transcript_22019;tissues_transcript_26542;tissues_transcript_2770;tissues_transcript_34398;tissues_transcript_37796;tissues_transcript_38566;tissues_transcript_41999;tissues_transcript_45568;tissues_transcript_45701;tissues_transcript_46468;tissues_transcript_48977;…	K00059+K00059+K00059+K09458+K00208+K00059+K19562+K09458+K00059+K09458+K09458+K00208+K09458+K00059+K00059+K00059+K09458+K09458+K00059+K00208+K00059+K00208+K01012+K00208+K00059+K09458+K00208+K00059+K09458+K00208+K00059+K00059+K00059
Lipoic acid metabolism	ko00785	5	tissues_transcript_35990;tissues_transcript_41867;tissues_transcript_46084;tissues_transcript_67809;tissues_transcript_67887;	K03644+K03644+K03801+K03644+K03644
Folate biosynthesis	ko00790	99	tissues_transcript_11085;tissues_transcript_11245;tissues_transcript_12818;tissues_transcript_13403;tissues_transcript_13889;tissues_transcript_15541;tissues_transcript_170;tissues_transcript_20321;tissues_transcript_22761;tissues_transcript_25391;tissues_transcript_2548;tissues_transcript_25537;tissues_transcript_27054;tissues_transcript_2721;tissues_transcript_27591;tissues_transcript_27666;tis…	K15631+K15631+K03635+K03637+K01930+K18482+K15631+K14652+K15376+K01930+K15376+K01307+K01930+K01930+K15631+K14652+K14652+K15631+K15631+K15376+K15376+K15376+K15376+K14652+K14652+K15376+K01930+K15631+K20457+K14652+K01307+K01495+K15631+K20457+K14652+K15631+K13998+K15631+K15631+K00079+K15631+K14652+K01930+K15631+K01724+K01495+K01307+K01930+K15631+K01495+K15376+K03637+K15631+K15631+K01930+K01307+K01930+…
Porphyrin and chlorophyll metabolism	ko00860	141	tissues_transcript_10558;tissues_transcript_11608;tissues_transcript_12419;tissues_transcript_12589;tissues_transcript_14020;tissues_transcript_14486;tissues_transcript_15204;tissues_transcript_16694;tissues_transcript_17108;tissues_transcript_17656;tissues_transcript_17764;tissues_transcript_18646;tissues_transcript_19014;tissues_transcript_2142;tissues_transcript_24548;tissues_transcript_24725;…	K21480+K13545+K19054+K13544+K01698+K01885+K03428+K21480+K19073+K01885+K18010+K01749+K13606+K01885+K00218+K19073+K02257+K03404+K01772+K13600+K01772+K01719+K01845+K00231+K22013+K13545+K03403+K02303+K00231+K01845+K01885+K13071+K19073+K02492+K00231+K03428+K01845+K01885+K01845+K02492+K13071+K01885+K01845+K13071+K00218+K00231+K01885+K13071+K13545+K13606+K03794+K04035+K13600+K13071+K13545+K21480+K13071+…
Terpenoid backbone biosynthesis	ko00900	139	tissues_transcript_10889;tissues_transcript_12115;tissues_transcript_12459;tissues_transcript_12514;tissues_transcript_12536;tissues_transcript_13062;tissues_transcript_13332;tissues_transcript_13516;tissues_transcript_13874;tissues_transcript_14115;tissues_transcript_1460;tissues_transcript_17494;tissues_transcript_17646;tissues_transcript_19544;tissues_transcript_2065;tissues_transcript_23050;t…	K03527+K00587+K08658+K01662+K00587+K01662+K13789+K13789+K00919+K01770+K01662+K03526+K15889+K13789+K01662+K00021+K03527+K00938+K00787+K13789+K05906+K13789+K01662+K00787+K01662+K15889+K13789+K01823+K00021+K05356+K15889+K13789+K00021+K06013+K15889+K00626+K13789+K15891+K15889+K01662+K00787+K00587+K05906+K01823+K11778+K00099+K05906+K13789+K00021+K00587+K06981+K15889+K14066+K00099+K05906+K05906+K11778+…
Indole alkaloid biosynthesis	ko00901	23	tissues_transcript_11478;tissues_transcript_3041;tissues_transcript_33303;tissues_transcript_3664;tissues_transcript_3727;tissues_transcript_39453;tissues_transcript_41872;tissues_transcript_44093;tissues_transcript_47118;tissues_transcript_5026;tissues_transcript_5280;tissues_transcript_54228;tissues_transcript_55387;tissues_transcript_57890;tissues_transcript_60957;tissues_transcript_63540;tiss…	K01757+K12695+K12695+K12695+K12695+K12695+K12695+K01757+K12695+K12695+K12695+K12695+K12695+K12695+K12695+K12695+K12695+K12695+K12695+K01757+K12695+K12695+K12695
Monoterpenoid biosynthesis	ko00902	35	tissues_transcript_10121;tissues_transcript_11415;tissues_transcript_13239;tissues_transcript_13412;tissues_transcript_22259;tissues_transcript_26447;tissues_transcript_31808;tissues_transcript_33105;tissues_transcript_33115;tissues_transcript_33330;tissues_transcript_3679;tissues_transcript_37164;tissues_transcript_37775;tissues_transcript_37991;tissues_transcript_41064;tissues_transcript_43156;…	K23232+K15095+K23810+K23810+K23232+K23232+K15095+K15095+K20618+K15095+K23810+K23810+K15095+K23810+K23232+K20618+K23810+K23232+K15095+K23810+K15095+K23810+K23232+K23810+K23810+K15095+K15095+K23232+K18108+K15095+K15095+K23232+K23232+K23232+K15095
Limonene and pinene degradation	ko00903	39	tissues_transcript_15185;tissues_transcript_16285;tissues_transcript_16718;tissues_transcript_18377;tissues_transcript_18779;tissues_transcript_21706;tissues_transcript_24516;tissues_transcript_26517;tissues_transcript_28316;tissues_transcript_28372;tissues_transcript_33702;tissues_transcript_35181;tissues_transcript_39054;tissues_transcript_39188;tissues_transcript_41592;tissues_transcript_4188;…	K00128+K00128+K00128+K00128+K00128+K00128+K00128+K00128+K01692+K00128+K00128+K00128+K00128+K01692+K00128+K00128+K00128+K00128+K00128+K01692+K00128+K00128+K00128+K00128+K00128+K00128+K00128+K00128+K01692+K00128+K00128+K00128+K00128+K00128+K14731+K00128+K00128+K00128+K00128
Diterpenoid biosynthesis	ko00904	36	tissues_transcript_13982;tissues_transcript_16680;tissues_transcript_20523;tissues_transcript_21196;tissues_transcript_21833;tissues_transcript_26243;tissues_transcript_27234;tissues_transcript_27767;tissues_transcript_28211;tissues_transcript_29388;tissues_transcript_31271;tissues_transcript_31767;tissues_transcript_35240;tissues_transcript_35411;tissues_transcript_37232;tissues_transcript_37454…	K04125+K04125+K04125+K04122+K13070+K17961+K04122+K04124+K04125+K04121+K05282+K04125+K04124+K04120+K04121+K04125+K04122+K04122+K04125+K04124+K04125+K04123+K04124+K04123+K04122+K04123+K04125+K04122+K04123+K04124+K04125+K04121+K05282+K04122+K04125+K04122
Brassinosteroid biosynthesis	ko00905	24	tissues_transcript_15860;tissues_transcript_25768;tissues_transcript_31107;tissues_transcript_32532;tissues_transcript_34004;tissues_transcript_35311;tissues_transcript_35693;tissues_transcript_37323;tissues_transcript_40859;tissues_transcript_4087;tissues_transcript_41013;tissues_transcript_41472;tissues_transcript_41748;tissues_transcript_44219;tissues_transcript_5532;tissues_transcript_57609;t…	K12637+K09588+K15639+K15639+K09590+K15639+K12637+K09590+K12637+K15639+K20623+K09588+K09587+K09590+K20623+K20623+K20623+K09588+K12639+K12639+K09590+K12637+K12637+K15639
Carotenoid biosynthesis	ko00906	88	tissues_transcript_10650;tissues_transcript_12143;tissues_transcript_17616;tissues_transcript_18481;tissues_transcript_20177;tissues_transcript_2296;tissues_transcript_24062;tissues_transcript_24466;tissues_transcript_25169;tissues_transcript_25352;tissues_transcript_26198;tissues_transcript_2762;tissues_transcript_30841;tissues_transcript_30877;tissues_transcript_3109;tissues_transcript_31172;ti…	K09843+K09842+K09835+K09837+K09837+K02293+K15747+K06444+K09843+K09842+K02293+K09840+K09839+K09842+K02291+K09835+K00514+K09840+K14595+K02291+K00514+K02291+K00514+K09835+K09838+K09840+K09838+K09840+K09843+K09835+K09835+K09835+K09838+K14593+K09838+K09837+K14593+K09838+K09838+K02291+K15747+K14595+K09835+K15746+K09841+K09842+K15747+K09843+K09843+K14595+K15744+K09835+K09840+K00514+K09838+K15746+K09842+…
Zeatin biosynthesis	ko00908	56	tissues_transcript_12575;tissues_transcript_20544;tissues_transcript_20685;tissues_transcript_24368;tissues_transcript_26260;tissues_transcript_29133;tissues_transcript_30780;tissues_transcript_32254;tissues_transcript_34365;tissues_transcript_35996;tissues_transcript_36794;tissues_transcript_36837;tissues_transcript_3717;tissues_transcript_37294;tissues_transcript_39429;tissues_transcript_41001;…	K13496+K13496+K23452+K13496+K00279+K23452+K13496+K13496+K00791+K23452+K23452+K00791+K00279+K23452+K13493+K23452+K13496+K00791+K00279+K23452+K13493+K00279+K23452+K23452+K13493+K00279+K00279+K23452+K13496+K00791+K23452+K13493+K23452+K23452+K13496+K13496+K23452+K00279+K13496+K13496+K23452+K00279+K13496+K23452+K23452+K13496+K23452+K00791+K00279+K23452+K23452+K13496+K23452+K13495+K13496+K23452
Sesquiterpenoid and triterpenoid biosynthesis	ko00909	69	tissues_transcript_1080;tissues_transcript_1705;tissues_transcript_24790;tissues_transcript_25744;tissues_transcript_28353;tissues_transcript_29365;tissues_transcript_29536;tissues_transcript_29586;tissues_transcript_30354;tissues_transcript_30613;tissues_transcript_30641;tissues_transcript_31325;tissues_transcript_31977;tissues_transcript_32141;tissues_transcript_32545;tissues_transcript_32777;t…	K14182+K15813+K15803+K15472+K15472+K00511+K15803+K00511+K15472+K15813+K15803+K00801+K15891+K15813+K15803+K15803+K15803+K20659+K15803+K00801+K15813+K15803+K14175+K15472+K14182+K00511+K15803+K15891+K15891+K15803+K15803+K20659+K15891+K00801+K15472+K15803+K14175+K14175+K14182+K14182+K00511+K15803+K00511+K15472+K15472+K15472+K15472+K00511+K15472+K14173+K00511+K15813+K20659+K14182+K15472+K15472+K15472+…
Nitrogen metabolism	ko00910	79	tissues_transcript_10446;tissues_transcript_12141;tissues_transcript_12979;tissues_transcript_13218;tissues_transcript_13328;tissues_transcript_13677;tissues_transcript_1390;tissues_transcript_15843;tissues_transcript_16297;tissues_transcript_17213;tissues_transcript_18302;tissues_transcript_18635;tissues_transcript_18922;tissues_transcript_20124;tissues_transcript_22732;tissues_transcript_24092;…	K01673+K01915+K01673+K00459+K00262+K01455+K01915+K01673+K01673+K00262+K00264+K00264+K01673+K01673+K10534+K00262+K10534+K01673+K01455+K01915+K01915+K00459+K00284+K00284+K01915+K01673+K00459+K01673+K00262+K01915+K00264+K00264+K00459+K01915+K00262+K00459+K00264+K01455+K01673+K01455+K01673+K01673+K00261+K01455+K00264+K00284+K10534+K00284+K01455+K10534+K00459+K00284+K00264+K00261+K01673+K01673+K01455+…
Sulfur metabolism	ko00920	103	tissues_transcript_10325;tissues_transcript_10840;tissues_transcript_12960;tissues_transcript_13528;tissues_transcript_13945;tissues_transcript_15411;tissues_transcript_1590;tissues_transcript_16840;tissues_transcript_18514;tissues_transcript_21373;tissues_transcript_22619;tissues_transcript_23222;tissues_transcript_25356;tissues_transcript_25631;tissues_transcript_2744;tissues_transcript_28068;t…	K01738+K13811+K00860+K00387+K05907+K22966+K00392+K00860+K01011+K13811+K01738+K13034+K01738+K01739+K17285+K00860+K01738+K01738+K13811+K00387+K13811+K00387+K00640+K00958+K01082+K02045+K01082+K01739+K05907+K01739+K22966+K01082+K22966+K13811+K00640+K01738+K02045+K13034+K01738+K00381+K00387+K13034+K02045+K00640+K00387+K01082+K01738+K01738+K17285+K22966+K01739+K13811+K17285+K01739+K00640+K01738+K00387+…
Phenylpropanoid biosynthesis	ko00940	413	tissues_transcript_10175;tissues_transcript_10262;tissues_transcript_10430;tissues_transcript_10623;tissues_transcript_10810;tissues_transcript_11124;tissues_transcript_11397;tissues_transcript_11700;tissues_transcript_11773;tissues_transcript_11913;tissues_transcript_12236;tissues_transcript_12401;tissues_transcript_12798;tissues_transcript_13301;tissues_transcript_13410;tissues_transcript_13681…	K13066+K00487+K00430+K22395+K00430+K00487+K00430+K01188+K18368+K09753+K22395+K00083+K13066+K13066+K13065+K13066+K00588+K13066+K09753+K00430+K13066+K12355+K13066+K00430+K11188+K00083+K11188+K00430+K09753+K00430+K01188+K00430+K10775+K00430+K00430+K00083+K00083+K13065+K00430+K00588+K05350+K00588+K13065+K01188+K05350+K01188+K05349+K01904+K13065+K01188+K00083+K22395+K01188+K00430+K05349+K23260+K01188+…
Flavonoid biosynthesis	ko00941	137	tissues_transcript_10262;tissues_transcript_10497;tissues_transcript_11124;tissues_transcript_11916;tissues_transcript_13410;tissues_transcript_13507;tissues_transcript_14129;tissues_transcript_14278;tissues_transcript_18937;tissues_transcript_19557;tissues_transcript_19670;tissues_transcript_19869;tissues_transcript_20731;tissues_transcript_21338;tissues_transcript_22888;tissues_transcript_22900…	K00487+K05278+K00487+K05278+K13065+K00660+K00588+K22845+K13082+K13080+K13080+K13080+K01859+K13065+K00588+K00475+K00588+K13065+K13080+K13065+K05278+K01859+K01859+K13082+K00475+K22845+K00660+K05278+K01859+K05278+K13065+K00588+K01859+K01859+K01859+K13082+K05278+K13065+K13065+K22845+K00588+K01859+K01859+K00588+K13082+K08695+K13065+K13080+K13065+K05278+K22845+K13065+K13080+K13080+K05278+K13080+K05278+…
Anthocyanin biosynthesis	ko00942	4	tissues_transcript_37420;tissues_transcript_52993;tissues_transcript_57641;tissues_transcript_70459;	K21383+K17193+K12930+K21383
Isoflavonoid biosynthesis	ko00943	31	tissues_transcript_10770;tissues_transcript_11359;tissues_transcript_14382;tissues_transcript_20868;tissues_transcript_20977;tissues_transcript_24069;tissues_transcript_28295;tissues_transcript_30124;tissues_transcript_31702;tissues_transcript_33099;tissues_transcript_33286;tissues_transcript_33903;tissues_transcript_36296;tissues_transcript_42119;tissues_transcript_42581;tissues_transcript_43168…	K13260+K13260+K13260+K13260+K13260+K13260+K13260+K13258+K13260+K13260+K13264+K13260+K13260+K13260+K13260+K13260+K13258+K13260+K22932+K13260+K13260+K13260+K13260+K13260+K13260+K13260+K13260+K13260+K13260+K13260+K13260
Flavone and flavonol biosynthesis	ko00944	24	tissues_transcript_19557;tissues_transcript_19670;tissues_transcript_19869;tissues_transcript_25284;tissues_transcript_33286;tissues_transcript_41952;tissues_transcript_42672;tissues_transcript_44122;tissues_transcript_44137;tissues_transcript_46120;tissues_transcript_55919;tissues_transcript_58385;tissues_transcript_59004;tissues_transcript_60894;tissues_transcript_61918;tissues_transcript_63763…	K13080+K13080+K13080+K13080+K13264+K13080+K22771+K13080+K13080+K13080+K13080+K13080+K13080+K13080+K13080+K13080+K22772+K13080+K13080+K13080+K13080+K13080+K13080+K13080
Stilbenoid, diarylheptanoid and gingerol biosynthesis	ko00945	51	tissues_transcript_10262;tissues_transcript_11124;tissues_transcript_13410;tissues_transcript_14129;tissues_transcript_21338;tissues_transcript_22888;tissues_transcript_24036;tissues_transcript_24243;tissues_transcript_25461;tissues_transcript_32824;tissues_transcript_33187;tissues_transcript_35702;tissues_transcript_36043;tissues_transcript_36243;tissues_transcript_38868;tissues_transcript_41601…	K00487+K00487+K13065+K00588+K13065+K00588+K00588+K13065+K13065+K13065+K00588+K13065+K13065+K00588+K00588+K13065+K13065+K13065+K00588+K13065+K13065+K00487+K00588+K13065+K13065+K13065+K09754+K00487+K13065+K13065+K00588+K13065+K00588+K13065+K13065+K13065+K13065+K13065+K13065+K13065+K13065+K00487+K13065+K13065+K13065+K00588+K13065+K13065+K13065+K13065+K13065
Isoquinoline alkaloid biosynthesis	ko00950	73	tissues_transcript_10395;tissues_transcript_10599;tissues_transcript_1358;tissues_transcript_13672;tissues_transcript_16242;tissues_transcript_18266;tissues_transcript_1948;tissues_transcript_2129;tissues_transcript_25990;tissues_transcript_26880;tissues_transcript_30433;tissues_transcript_31173;tissues_transcript_31826;tissues_transcript_33637;tissues_transcript_34485;tissues_transcript_35157;ti…	K15849+K22097+K00276+K14976+K00276+K00811+K00276+K15849+K14454+K00422+K14454+K00276+K00276+K14975+K13396+K00815+K14454+K00276+K00815+K00276+K00422+K14975+K00422+K00276+K00276+K14975+K01593+K14975+K00276+K01593+K14454+K14975+K00276+K00276+K22097+K00422+K14455+K14454+K22097+K00422+K14454+K14454+K14975+K14455+K00811+K00276+K01593+K14455+K00815+K14975+K00276+K14454+K00276+K00276+K00276+K00276+K14455+…
Tropane, piperidine and pyridine alkaloid biosynthesis	ko00960	64	tissues_transcript_10395;tissues_transcript_10607;tissues_transcript_11003;tissues_transcript_11757;tissues_transcript_11980;tissues_transcript_13213;tissues_transcript_1358;tissues_transcript_14998;tissues_transcript_16242;tissues_transcript_18266;tissues_transcript_1948;tissues_transcript_19612;tissues_transcript_20839;tissues_transcript_2129;tissues_transcript_25456;tissues_transcript_25990;ti…	K15849+K18606+K18606+K08081+K00817+K08081+K00276+K08081+K00276+K00811+K00276+K08081+K18606+K15849+K08081+K14454+K14454+K00276+K00276+K08081+K00815+K14454+K00276+K00815+K00276+K00817+K00276+K00276+K08081+K00276+K14454+K18606+K00276+K00276+K14455+K14454+K14454+K14454+K14455+K00811+K00276+K14455+K00815+K00276+K14454+K00276+K00276+K00276+K00276+K18606+K14455+K00811+K00276+K14454+K18606+K00276+K00817+…
Betalain biosynthesis	ko00965	7	tissues_transcript_11871;tissues_transcript_26363;tissues_transcript_45127;tissues_transcript_47587;tissues_transcript_53441;tissues_transcript_56916;tissues_transcript_70470;	K15777+K15777+K01593+K01593+K15777+K01593+K01593
Glucosinolate biosynthesis	ko00966	14	tissues_transcript_10308;tissues_transcript_26829;tissues_transcript_27043;tissues_transcript_27621;tissues_transcript_3949;tissues_transcript_44111;tissues_transcript_49273;tissues_transcript_50346;tissues_transcript_56167;tissues_transcript_64708;tissues_transcript_66518;tissues_transcript_66731;tissues_transcript_7106;tissues_transcript_71826;	K00826+K00826+K01703+K00826+K01703+K00826+K00826+K00826+K00826+K00826+K00826+K00826+K00826+K00826
Aminoacyl-tRNA biosynthesis	ko00970	253	tissues_transcript_10799;tissues_transcript_11918;tissues_transcript_127;tissues_transcript_12988;tissues_transcript_1355;tissues_transcript_14200;tissues_transcript_14486;tissues_transcript_15329;tissues_transcript_15618;tissues_transcript_15762;tissues_transcript_16176;tissues_transcript_16715;tissues_transcript_16990;tissues_transcript_17656;tissues_transcript_20158;tissues_transcript_2024;tis…	K04567+K02434+K01870+K01867+K02433+K01881+K01885+K01870+K01870+K01870+K01889+K22503+K01881+K01885+K04567+K02433+K02433+K01893+K01885+K01872+K01873+K01866+K01872+K01868+K01872+K01892+K22503+K01880+K01893+K01880+K01870+K01870+K01867+K01867+K01869+K00604+K01873+K01870+K22503+K01892+K01886+K01870+K01883+K01870+K02434+K01887+K02433+K01890+K02433+K01886+K02433+K01876+K01868+K01887+K01893+K01876+K02434+…
Biosynthesis of various secondary metabolites - part 2	ko00998	2	tissues_transcript_35600;tissues_transcript_67415;	K21568+K21568
Biosynthesis of unsaturated fatty acids	ko01040	71	tissues_transcript_10160;tissues_transcript_10339;tissues_transcript_10353;tissues_transcript_10456;tissues_transcript_16261;tissues_transcript_17772;tissues_transcript_2217;tissues_transcript_24539;tissues_transcript_25221;tissues_transcript_25759;tissues_transcript_27540;tissues_transcript_30665;tissues_transcript_32093;tissues_transcript_34658;tissues_transcript_3494;tissues_transcript_35978;t…	K03921+K03921+K00232+K10258+K10251+K00232+K00232+K07513+K00232+K00232+K07513+K10251+K00232+K00232+K03921+K00232+K07513+K07513+K07513+K07513+K00232+K07513+K07513+K07513+K07513+K10251+K01068+K00232+K00507+K10251+K03921+K07513+K00232+K07513+K10251+K10251+K00232+K00232+K00232+K07513+K00232+K03921+K03921+K00232+K00232+K00232+K07513+K07513+K07513+K00232+K00232+K03921+K07513+K00232+K00507+K10703+K07513+…
Carbon metabolism	ko01200	887	tissues_transcript_10069;tissues_transcript_10076;tissues_transcript_10112;tissues_transcript_10273;tissues_transcript_10325;tissues_transcript_10353;tissues_transcript_10414;tissues_transcript_10593;tissues_transcript_10648;tissues_transcript_10698;tissues_transcript_10764;tissues_transcript_11089;tissues_transcript_11210;tissues_transcript_11540;tissues_transcript_11557;tissues_transcript_11701…	K19269+K00162+K05605+K01783+K01738+K00232+K01807+K00121+K02160+K01057+K01803+K01057+K19269+K01647+K00850+K01595+K01803+K15893+K01057+K01057+K00121+K00850+K00140+K01754+K03841+K01803+K00850+K03841+K00873+K03781+K01455+K01807+K00033+K00029+K00615+K01595+K00600+K00033+K01962+K15919+K00600+K03841+K03781+K01602+K01962+K00236+K00058+K01679+K01895+K01938+K00134+K00031+K01100+K00232+K01681+K03781+K01803+…
2-Oxocarboxylic acid metabolism	ko01210	160	tissues_transcript_10308;tissues_transcript_11540;tissues_transcript_11626;tissues_transcript_12135;tissues_transcript_12179;tissues_transcript_12742;tissues_transcript_13173;tissues_transcript_16585;tissues_transcript_17;tissues_transcript_1783;tissues_transcript_17897;tissues_transcript_18266;tissues_transcript_18298;tissues_transcript_20571;tissues_transcript_2104;tissues_transcript_25303;tiss…	K00826+K01647+K01704+K01704+K00053+K14682+K00053+K00053+K00031+K00053+K01681+K00811+K00031+K00030+K00928+K01649+K00031+K00053+K14454+K00826+K14677+K01703+K00826+K00030+K01687+K00814+K14677+K01681+K01647+K01681+K14454+K01653+K01681+K01649+K00053+K14682+K01704+K00030+K00145+K00814+K01653+K01681+K00053+K00814+K01649+K14454+K01653+K00053+K01647+K00053+K14677+K01687+K14682+K01649+K01653+K00814+K14272+…
Fatty acid metabolism	ko01212	208	tissues_transcript_10160;tissues_transcript_10339;tissues_transcript_10353;tissues_transcript_10456;tissues_transcript_10648;tissues_transcript_10911;tissues_transcript_12002;tissues_transcript_12767;tissues_transcript_13230;tissues_transcript_14145;tissues_transcript_1447;tissues_transcript_1473;tissues_transcript_1496;tissues_transcript_1509;tissues_transcript_15117;tissues_transcript_1539;tiss…	K03921+K03921+K00232+K10258+K02160+K00059+K00059+K01897+K00059+K01897+K01897+K10527+K01897+K01897+K01962+K01897+K09458+K01897+K01962+K10527+K10251+K10527+K10781+K10527+K00232+K00208+K01963+K01897+K01897+K00059+K00232+K10527+K07513+K01963+K01897+K01897+K00232+K01897+K01897+K00232+K00648+K07512+K01897+K01961+K07513+K09458+K01692+K10527+K11262+K18660+K10251+K00626+K00232+K10781+K01897+K01897+K09478+…
Biosynthesis of amino acids	ko01230	718	tissues_transcript_10250;tissues_transcript_10273;tissues_transcript_10308;tissues_transcript_10325;tissues_transcript_10395;tissues_transcript_10414;tissues_transcript_10764;tissues_transcript_11540;tissues_transcript_11557;tissues_transcript_11626;tissues_transcript_1194;tissues_transcript_11980;tissues_transcript_11986;tissues_transcript_12135;tissues_transcript_12141;tissues_transcript_12179;…	K00549+K01783+K00826+K01738+K15849+K01807+K01803+K01647+K00850+K01704+K00549+K00817+K01803+K01704+K01915+K00053+K00891+K12657+K14682+K00850+K01754+K01803+K00549+K00850+K00053+K00873+K12657+K01626+K01915+K01807+K00789+K00615+K00600+K12657+K01693+K00600+K00058+K00053+K00134+K00031+K00053+K01681+K00789+K01803+K00811+K01689+K00031+K00264+K01609+K00264+K01733+K00600+K13832+K00615+K00766+K00927+K00030+…
ABC transporters	ko02010	184	tissues_transcript_10020;tissues_transcript_10636;tissues_transcript_13338;tissues_transcript_1383;tissues_transcript_14179;tissues_transcript_14991;tissues_transcript_15624;tissues_transcript_15857;tissues_transcript_1615;tissues_transcript_16505;tissues_transcript_16729;tissues_transcript_17338;tissues_transcript_18395;tissues_transcript_1867;tissues_transcript_19807;tissues_transcript_2;tissue…	K05658+K05658+K05681+K05665+K05658+K05658+K05658+K05666+K05658+K05677+K05658+K05666+K05666+K05681+K05658+K05666+K05658+K05658+K05658+K15628+K05656+K08712+K05666+K05658+K05681+K08712+K05681+K05666+K05666+K05666+K05666+K05658+K05681+K05663+K05666+K05663+K05681+K08712+K05681+K05666+K05658+K05666+K08712+K05681+K05665+K05641+K05666+K08712+K15628+K05666+K08712+K15628+K02045+K05666+K05666+K05666+K05666+…
Ribosome biogenesis in eukaryotes	ko03008	276	tissues_transcript_105;tissues_transcript_10713;tissues_transcript_10802;tissues_transcript_110;tissues_transcript_111;tissues_transcript_11616;tissues_transcript_12100;tissues_transcript_12251;tissues_transcript_12501;tissues_transcript_12976;tissues_transcript_13381;tissues_transcript_134;tissues_transcript_13450;tissues_transcript_14106;tissues_transcript_14748;tissues_transcript_16066;tissues…	K14558+K03097+K14574+K14558+K14290+K14571+K14544+K14557+K14545+K11131+K03115+K14290+K14548+K07936+K14544+K14537+K14537+K14544+K12619+K14548+K14544+K14537+K11883+K03097+K12619+K11129+K03115+K06943+K14558+K11883+K03539+K12619+K03537+K14559+K14544+K13288+K03115+K14548+K14566+K12845+K14570+K03115+K14564+K14552+K14565+K14537+K14548+K14538+K12619+K14575+K07936+K11108+K14536+K14521+K11883+K03539+K14554+…
Ribosome	ko03010	655	tissues_transcript_10166;tissues_transcript_10289;tissues_transcript_10899;tissues_transcript_11303;tissues_transcript_11351;tissues_transcript_11414;tissues_transcript_11442;tissues_transcript_11572;tissues_transcript_12017;tissues_transcript_12099;tissues_transcript_12122;tissues_transcript_12253;tissues_transcript_12274;tissues_transcript_12547;tissues_transcript_12576;tissues_transcript_12623…	K02886+K02996+K02988+K02981+K02984+K02981+K02932+K02987+K02987+K02945+K02991+K02985+K02984+K02938+K02936+K02890+K02987+K02934+K02995+K02991+K02871+K02991+K02908+K02865+K02897+K02873+K02993+K02957+K02865+K02995+K02872+K02995+K02995+K02885+K02866+K02885+K02877+K02879+K02877+K02874+K02886+K02903+K02940+K02993+K02940+K02954+K02877+K02883+K02937+K02986+K02889+K02937+K02964+K02904+K02880+K02914+K02933+…
RNA transport	ko03013	500	tissues_transcript_10012;tissues_transcript_1005;tissues_transcript_1042;tissues_transcript_10420;tissues_transcript_10796;tissues_transcript_11062;tissues_transcript_11088;tissues_transcript_111;tissues_transcript_11576;tissues_transcript_116;tissues_transcript_11802;tissues_transcript_11848;tissues_transcript_11866;tissues_transcript_12;tissues_transcript_1200;tissues_transcript_12388;tissues_t…	K03246+K13174+K12882+K03113+K03231+K03257+K03257+K14290+K03248+K14289+K03245+K03257+K03249+K14326+K03254+K14313+K14294+K14292+K12876+K12881+K03239+K03237+K03257+K14290+K14294+K14307+K07936+K03259+K13126+K12883+K03240+K13126+K14292+K14327+K03259+K10577+K03253+K03113+K03236+K03254+K12877+K03113+K03113+K14318+K03248+K14298+K12160+K14324+K03260+K14299+K13126+K00784+K03257+K03253+K13126+K03253+K14304+…
mRNA surveillance pathway	ko03015	366	tissues_transcript_10066;tissues_transcript_1042;tissues_transcript_10721;tissues_transcript_10780;tissues_transcript_11288;tissues_transcript_113;tissues_transcript_11624;tissues_transcript_11853;tissues_transcript_12;tissues_transcript_1217;tissues_transcript_12289;tissues_transcript_1255;tissues_transcript_12665;tissues_transcript_12788;tissues_transcript_12953;tissues_transcript_13078;tissues…	K14402+K12882+K14411+K14411+K14404+K14409+K14404+K14396+K14326+K15542+K14396+K06269+K14396+K14396+K14294+K12876+K12881+K14397+K14294+K11584+K14408+K06100+K13126+K12883+K13126+K11583+K14327+K14400+K14402+K14399+K12877+K14404+K13917+K14324+K06269+K11584+K14409+K06269+K13126+K13126+K14328+K12875+K12812+K14411+K14411+K06269+K14408+K14416+K12875+K11584+K11584+K11584+K04354+K14403+K14411+K14400+K11584+…
RNA degradation	ko03018	351	tissues_transcript_10318;tissues_transcript_10612;tissues_transcript_11262;tissues_transcript_11283;tissues_transcript_11426;tissues_transcript_11557;tissues_transcript_11928;tissues_transcript_122;tissues_transcript_12503;tissues_transcript_12781;tissues_transcript_13116;tissues_transcript_1437;tissues_transcript_14671;tissues_transcript_14778;tissues_transcript_15391;tissues_transcript_15554;ti…	K10643+K11600+K12608+K12581+K12608+K00850+K07573+K14442+K00962+K00850+K00850+K13126+K13126+K04077+K12592+K12611+K12589+K12619+K12603+K12614+K12619+K13126+K01689+K13126+K12621+K12581+K12625+K12622+K12621+K00850+K00850+K04043+K12581+K12604+K12604+K12619+K01689+K12604+K01148+K07573+K01148+K12608+K13126+K12627+K01689+K18681+K12608+K10643+K18681+K12598+K04077+K12626+K01689+K04077+K12627+K18681+K01689+…
RNA polymerase	ko03020	82	tissues_transcript_11336;tissues_transcript_11956;tissues_transcript_13401;tissues_transcript_15068;tissues_transcript_15734;tissues_transcript_171;tissues_transcript_18426;tissues_transcript_20751;tissues_transcript_21639;tissues_transcript_24210;tissues_transcript_25376;tissues_transcript_25418;tissues_transcript_2558;tissues_transcript_25876;tissues_transcript_26140;tissues_transcript_26894;ti…	K03046+K03005+K03013+K03012+K03014+K03010+K03010+K03009+K03025+K03016+K03025+K03006+K03010+K03046+K03016+K03006+K03006+K03006+K03006+K03046+K03006+K03011+K14721+K03024+K03011+K03011+K03046+K03024+K03046+K03046+K03046+K03046+K03002+K03006+K03026+K03046+K03007+K03002+K03025+K03012+K03020+K03046+K03027+K03016+K03046+K14721+K03024+K03046+K03013+K03011+K02999+K03006+K03040+K03027+K03014+K03023+K03046+…
Basal transcription factors	ko03022	135	tissues_transcript_10620;tissues_transcript_11325;tissues_transcript_1169;tissues_transcript_11872;tissues_transcript_11983;tissues_transcript_12119;tissues_transcript_13252;tissues_transcript_13692;tissues_transcript_14358;tissues_transcript_14367;tissues_transcript_1495;tissues_transcript_16202;tissues_transcript_17183;tissues_transcript_17236;tissues_transcript_18808;tissues_transcript_1907;ti…	K03139+K03137+K10843+K03124+K03143+K03132+K03132+K10843+K03127+K03125+K03144+K03127+K03134+K03128+K03125+K03126+K03122+K06634+K03132+K14649+K03128+K03143+K03125+K03136+K03127+K03124+K03130+K03137+K03122+K03128+K03124+K03127+K03129+K03122+K10843+K03138+K03136+K03124+K03129+K03124+K03128+K02202+K03124+K03120+K03124+K03129+K14649+K03138+K14649+K03122+K03120+K03144+K03138+K03131+K03139+K03137+K02202+…
DNA replication	ko03030	91	tissues_transcript_11783;tissues_transcript_1270;tissues_transcript_12843;tissues_transcript_12924;tissues_transcript_12999;tissues_transcript_13492;tissues_transcript_14329;tissues_transcript_14374;tissues_transcript_15248;tissues_transcript_17095;tissues_transcript_17683;tissues_transcript_18617;tissues_transcript_19263;tissues_transcript_19534;tissues_transcript_237;tissues_transcript_24108;ti…	K03506+K07466+K02326+K07466+K10739+K02540+K02540+K07466+K02335+K07466+K04799+K07466+K03111+K10740+K10754+K02210+K03506+K10756+K02212+K02209+K02210+K03504+K10745+K02685+K10756+K10747+K02320+K04802+K04799+K07466+K02540+K04802+K07466+K02328+K02324+K02540+K10755+K10739+K10743+K07466+K10756+K10755+K10756+K02684+K07466+K10747+K10755+K07466+K04799+K03111+K07466+K07466+K02540+K10754+K02325+K02209+K10754+…
Spliceosome	ko03040	673	tissues_transcript_10041;tissues_transcript_10047;tissues_transcript_10129;tissues_transcript_10148;tissues_transcript_10218;tissues_transcript_1042;tissues_transcript_10595;tissues_transcript_10715;tissues_transcript_10855;tissues_transcript_10861;tissues_transcript_11045;tissues_transcript_11280;tissues_transcript_11374;tissues_transcript_11432;tissues_transcript_11456;tissues_transcript_1205;t…	K12826+K12897+K12900+K12890+K12893+K12882+K12861+K12868+K12896+K12835+K03283+K10599+K11092+K11092+K12662+K12843+K12891+K12897+K12823+K12891+K12900+K12900+K12876+K12881+K11093+K12817+K12831+K12896+K03283+K12858+K12885+K12863+K12846+K12896+K12858+K12891+K12883+K12858+K12818+K12818+K12900+K12823+K12815+K12817+K11091+K12817+K12900+K09564+K12877+K12733+K12741+K12815+K03283+K12891+K12833+K12860+K12891+…
Proteasome	ko03050	160	tissues_transcript_10609;tissues_transcript_10868;tissues_transcript_11034;tissues_transcript_11320;tissues_transcript_11375;tissues_transcript_11491;tissues_transcript_11814;tissues_transcript_12166;tissues_transcript_12277;tissues_transcript_12293;tissues_transcript_12313;tissues_transcript_12595;tissues_transcript_12652;tissues_transcript_12739;tissues_transcript_12794;tissues_transcript_12810…	K02737+K02730+K06699+K03030+K06691+K06700+K02730+K02731+K02739+K02737+K03064+K03031+K02736+K03061+K02725+K02726+K02736+K03029+K02728+K02732+K02725+K02729+K02735+K02725+K03033+K02737+K03039+K02727+K02727+K06699+K02737+K02737+K10881+K02731+K02732+K10881+K03066+K02732+K02729+K02732+K02735+K02737+K03029+K03061+K03032+K02730+K06700+K03033+K03032+K03061+K02738+K03064+K02735+K03030+K02729+K02729+K03029+…
Protein export	ko03060	136	tissues_transcript_10127;tissues_transcript_10163;tissues_transcript_11940;tissues_transcript_12418;tissues_transcript_13303;tissues_transcript_13358;tissues_transcript_15209;tissues_transcript_16767;tissues_transcript_1750;tissues_transcript_19485;tissues_transcript_1965;tissues_transcript_19941;tissues_transcript_20295;tissues_transcript_2321;tissues_transcript_24200;tissues_transcript_25015;ti…	K03100+K03106+K09648+K09490+K12947+K12272+K03100+K03110+K09540+K03116+K09490+K07342+K07342+K03108+K03105+K03108+K13431+K09648+K10956+K03070+K03217+K03100+K12946+K12947+K13431+K03070+K03100+K03070+K09481+K03217+K03217+K03070+K13431+K13431+K13280+K03070+K03100+K03110+K03105+K09648+K03070+K12948+K09540+K10956+K03105+K13431+K09540+K03109+K03104+K10956+K03070+K03070+K09648+K10956+K03070+K03100+K10956+…
Base excision repair	ko03410	97	tissues_transcript_11783;tissues_transcript_12843;tissues_transcript_14912;tissues_transcript_15248;tissues_transcript_15543;tissues_transcript_17087;tissues_transcript_17683;tissues_transcript_24263;tissues_transcript_24376;tissues_transcript_25280;tissues_transcript_26094;tissues_transcript_27438;tissues_transcript_28100;tissues_transcript_28628;tissues_transcript_28641;tissues_transcript_29018…	K03506+K02326+K03660+K02335+K10802+K10802+K04799+K03506+K03652+K10798+K10803+K03504+K10798+K03648+K10798+K10798+K01247+K03660+K10747+K04802+K04799+K10771+K10798+K10563+K10773+K04802+K10798+K02328+K02324+K10798+K10772+K10798+K10798+K10563+K01142+K24070+K10798+K01142+K10772+K01247+K10798+K01246+K10771+K03575+K03648+K10747+K04799+K10798+K10798+K10798+K24070+K03660+K10771+K10798+K10773+K02325+K01142+…
Nucleotide excision repair	ko03420	123	tissues_transcript_1051;tissues_transcript_1169;tissues_transcript_11783;tissues_transcript_11983;tissues_transcript_1270;tissues_transcript_12843;tissues_transcript_12924;tissues_transcript_12999;tissues_transcript_13692;tissues_transcript_14374;tissues_transcript_149;tissues_transcript_1495;tissues_transcript_15248;tissues_transcript_17095;tissues_transcript_18240;tissues_transcript_18324;tissu…	K10609+K10843+K03506+K03143+K07466+K02326+K07466+K10739+K10843+K07466+K03657+K03144+K02335+K07466+K03868+K03868+K07466+K10740+K10754+K10570+K10610+K03506+K10756+K10140+K06634+K03657+K03143+K03504+K10839+K10848+K10841+K10756+K03657+K10848+K10747+K10843+K04802+K07466+K03868+K10140+K04802+K02202+K07466+K02328+K02324+K03144+K02202+K02202+K10755+K10739+K02202+K10843+K03868+K07466+K10570+K10756+K10570+…
Mismatch repair	ko03430	77	tissues_transcript_12511;tissues_transcript_1270;tissues_transcript_12924;tissues_transcript_12999;tissues_transcript_14374;tissues_transcript_14731;tissues_transcript_149;tissues_transcript_17095;tissues_transcript_1790;tissues_transcript_18617;tissues_transcript_19263;tissues_transcript_19534;tissues_transcript_237;tissues_transcript_24366;tissues_transcript_25929;tissues_transcript_26303;tissu…	K08739+K07466+K07466+K10739+K07466+K07456+K03657+K07466+K08734+K07466+K03111+K10740+K10754+K10756+K08737+K03657+K03504+K10756+K03657+K10747+K04802+K10858+K07466+K08734+K04802+K07466+K02328+K08737+K08739+K10755+K10739+K10858+K07466+K10756+K07456+K10755+K07456+K10756+K08737+K03657+K07466+K08737+K07456+K10747+K10755+K07466+K03111+K07456+K07466+K07466+K10754+K08736+K10754+K10756+K10746+K07456+K10739+…
Homologous recombination	ko03440	141	tissues_transcript_11579;tissues_transcript_1270;tissues_transcript_12813;tissues_transcript_12924;tissues_transcript_12999;tissues_transcript_1327;tissues_transcript_14374;tissues_transcript_15248;tissues_transcript_16628;tissues_transcript_16795;tissues_transcript_17095;tissues_transcript_18617;tissues_transcript_18885;tissues_transcript_18962;tissues_transcript_19263;tissues_transcript_19534;t…	K11864+K07466+K12173+K07466+K10739+K10728+K07466+K02335+K08775+K08775+K07466+K07466+K12173+K12173+K03111+K10740+K10881+K10881+K10875+K10901+K10866+K12173+K03504+K10879+K03655+K10882+K10683+K10683+K12173+K10875+K10875+K10875+K12173+K10875+K10866+K12173+K10875+K10683+K07466+K03655+K10683+K08775+K12173+K10683+K10866+K12173+K08775+K12173+K07466+K10879+K02328+K10865+K10875+K12173+K08991+K10739+K08775+…
Non-homologous end-joining	ko03450	21	tissues_transcript_11394;tissues_transcript_13402;tissues_transcript_13883;tissues_transcript_17683;tissues_transcript_25397;tissues_transcript_28143;tissues_transcript_28768;tissues_transcript_32660;tissues_transcript_33571;tissues_transcript_35943;tissues_transcript_38618;tissues_transcript_43294;tissues_transcript_44235;tissues_transcript_49589;tissues_transcript_50508;tissues_transcript_57190…	K10884+K10886+K10886+K04799+K10866+K10884+K10884+K04799+K10866+K10866+K10865+K10866+K10885+K10777+K04799+K10865+K10777+K03512+K10884+K10884+K04799
MAPK signaling pathway - plant	ko04016	560	tissues_transcript_10123;tissues_transcript_10145;tissues_transcript_10362;tissues_transcript_10436;tissues_transcript_10797;tissues_transcript_11081;tissues_transcript_11409;tissues_transcript_1150;tissues_transcript_11516;tissues_transcript_1165;tissues_transcript_1186;tissues_transcript_12428;tissues_transcript_12683;tissues_transcript_13000;tissues_transcript_13247;tissues_transcript_13254;ti…	K14498+K14498+K20547+K20547+K20547+K00940+K16224+K13422+K13420+K14509+K14509+K14496+K13424+K20547+K03781+K20547+K14498+K14496+K20718+K14497+K17686+K13413+K02183+K13447+K02183+K02183+K14510+K20718+K14516+K02183+K03781+K14509+K00940+K14497+K13449+K20536+K13422+K14497+K14514+K13416+K13424+K02183+K02183+K03781+K02183+K20557+K13424+K14516+K20714+K00940+K13413+K13422+K20718+K13424+K20726+K13449+K20557+…
Phosphatidylinositol signaling system	ko04070	182	tissues_transcript_10587;tissues_transcript_1113;tissues_transcript_1136;tissues_transcript_12074;tissues_transcript_12804;tissues_transcript_13058;tissues_transcript_14190;tissues_transcript_14897;tissues_transcript_14910;tissues_transcript_15292;tissues_transcript_15398;tissues_transcript_16164;tissues_transcript_17284;tissues_transcript_17567;tissues_transcript_1809;tissues_transcript_18245;ti…	K00901+K00889+K00889+K10572+K01092+K00913+K02183+K02183+K02183+K02183+K01099+K01092+K02183+K02183+K02183+K01092+K21797+K01092+K02183+K01110+K18081+K02183+K00888+K01099+K18081+K00921+K10572+K00901+K00913+K00901+K00921+K01092+K05857+K00921+K00981+K01092+K13024+K00981+K18081+K02183+K01110+K21797+K00901+K00901+K01092+K00889+K00921+K05857+K05857+K19801+K19801+K05857+K05857+K00889+K00901+K01110+K02183+…
Plant hormone signal transduction	ko04075	762	tissues_transcript_10123;tissues_transcript_10138;tissues_transcript_10145;tissues_transcript_10157;tissues_transcript_10161;tissues_transcript_1022;tissues_transcript_10281;tissues_transcript_10454;tissues_transcript_10809;tissues_transcript_10863;tissues_transcript_1107;tissues_transcript_11144;tissues_transcript_11301;tissues_transcript_11405;tissues_transcript_1150;tissues_transcript_11547;ti…	K14498+K13464+K14498+K14484+K13464+K14508+K14492+K14431+K14484+K14491+K14486+K14484+K14489+K13464+K13422+K14494+K14509+K14484+K14509+K14431+K13415+K14496+K14432+K13464+K14486+K14498+K13463+K13415+K14485+K14496+K13415+K14491+K14497+K14491+K13413+K14494+K14488+K14510+K14489+K14516+K14486+K14494+K14491+K14509+K13415+K14497+K13449+K14495+K13422+K14497+K14514+K14494+K13415+K14494+K13416+K14488+K14486+…
Ubiquitin mediated proteolysis	ko04120	414	tissues_transcript_1029;tissues_transcript_1043;tissues_transcript_1051;tissues_transcript_10821;tissues_transcript_11280;tissues_transcript_11719;tissues_transcript_12522;tissues_transcript_12892;tissues_transcript_13419;tissues_transcript_13991;tissues_transcript_14270;tissues_transcript_14514;tissues_transcript_14521;tissues_transcript_14588;tissues_transcript_14670;tissues_transcript_14700;ti…	K03347+K04706+K10609+K10144+K10599+K10144+K10615+K08770+K10580+K10573+K10581+K10576+K10573+K10688+K08770+K10573+K10580+K06689+K10579+K03357+K03363+K06689+K03869+K10577+K06688+K06689+K08770+K06689+K10590+K03094+K06689+K02977+K08770+K02927+K03868+K03868+K06689+K03094+K10260+K03178+K03094+K10260+K03869+K02927+K10592+K10579+K02977+K02977+K10589+K10570+K10610+K10581+K10685+K10140+K10144+K08770+K06689+…
Sulfur relay system	ko04122	38	tissues_transcript_12278;tissues_transcript_12818;tissues_transcript_13403;tissues_transcript_14722;tissues_transcript_17440;tissues_transcript_18514;tissues_transcript_18984;tissues_transcript_20856;tissues_transcript_28118;tissues_transcript_30262;tissues_transcript_30912;tissues_transcript_30985;tissues_transcript_34572;tissues_transcript_34847;tissues_transcript_35745;tissues_transcript_35932…	K14168+K03635+K03637+K14168+K11996+K01011+K11996+K21232+K12161+K14169+K04487+K11996+K04487+K04487+K04487+K04487+K11996+K04487+K14168+K14169+K03637+K14168+K14168+K03635+K04487+K21232+K21232+K14169+K01011+K03637+K04487+K04487+K11996+K11996+K21232+K03639+K03637+K14168
SNARE interactions in vesicular transport	ko04130	78	tissues_transcript_10023;tissues_transcript_10084;tissues_transcript_10256;tissues_transcript_10926;tissues_transcript_11585;tissues_transcript_11629;tissues_transcript_11678;tissues_transcript_11716;tissues_transcript_11859;tissues_transcript_11945;tissues_transcript_12382;tissues_transcript_12431;tissues_transcript_12672;tissues_transcript_12719;tissues_transcript_12869;tissues_transcript_14570…	K08486+K08488+K08488+K08486+K08492+K08493+K08486+K08500+K08503+K08488+K08515+K08516+K08503+K08517+K08503+K08495+K08503+K08503+K08503+K08506+K08486+K08515+K08486+K08503+K08486+K08486+K08495+K08486+K08503+K08505+K08490+K08503+K08486+K08493+K08490+K08504+K08495+K08488+K08495+K08490+K08488+K08488+K08493+K08486+K08496+K08490+K08486+K08504+K08503+K08488+K08488+K08503+K08493+K08503+K08493+K08490+K08506+…
Autophagy - other	ko04136	98	tissues_transcript_10270;tissues_transcript_13786;tissues_transcript_14403;tissues_transcript_14654;tissues_transcript_14962;tissues_transcript_15225;tissues_transcript_15891;tissues_transcript_16625;tissues_transcript_20375;tissues_transcript_20976;tissues_transcript_27127;tissues_transcript_28307;tissues_transcript_28637;tissues_transcript_29034;tissues_transcript_29070;tissues_transcript_31482…	K17906+K17606+K07203+K17606+K07203+K08342+K08341+K08341+K08341+K08339+K17888+K08333+K08336+K08343+K08266+K17908+K04382+K08343+K08341+K17606+K08269+K17906+K08343+K08343+K17907+K08343+K17906+K08331+K08334+K17606+K17606+K08334+K08342+K04382+K17907+K08269+K17606+K08269+K04382+K00914+K07204+K08341+K17606+K07204+K07203+K04382+K04382+K08341+K08334+K08333+K08341+K08343+K17606+K08337+K08341+K17908+K17906+…
Protein processing in endoplasmic reticulum	ko04141	742	tissues_transcript_10107;tissues_transcript_10183;tissues_transcript_102;tissues_transcript_10237;tissues_transcript_1029;tissues_transcript_10367;tissues_transcript_10685;tissues_transcript_10692;tissues_transcript_10870;tissues_transcript_11045;tissues_transcript_1106;tissues_transcript_11095;tissues_transcript_11200;tissues_transcript_1132;tissues_transcript_11360;tissues_transcript_11699;tiss…	K01456+K11718+K14005+K01456+K03347+K09503+K13249+K14012+K01456+K03283+K09487+K10666+K13993+K14018+K14016+K10666+K11863+K13993+K09523+K13989+K01456+K09490+K07953+K13525+K09487+K03237+K03283+K04079+K07151+K09487+K14012+K09517+K13993+K09503+K06689+K10636+K06689+K04079+K13250+K13250+K06689+K06689+K01456+K03094+K13993+K13993+K03283+K13993+K07151+K06689+K10636+K13993+K13993+K13993+K23741+K13993+K13993+…
Endocytosis	ko04144	532	tissues_transcript_10092;tissues_transcript_10146;tissues_transcript_10223;tissues_transcript_10334;tissues_transcript_10616;tissues_transcript_10878;tissues_transcript_1093;tissues_transcript_11045;tissues_transcript_1113;tissues_transcript_11134;tissues_transcript_11188;tissues_transcript_1136;tissues_transcript_11424;tissues_transcript_11499;tissues_transcript_11517;tissues_transcript_11664;ti…	K12195+K19476+K07937+K10364+K12486+K12196+K01115+K03283+K00889+K19476+K07889+K00889+K07904+K12471+K07937+K07904+K12183+K12184+K11866+K12472+K12183+K19366+K07897+K07897+K07904+K05757+K11866+K12492+K04645+K01115+K01115+K07937+K03283+K12189+K07897+K07937+K12192+K07889+K07904+K12189+K01115+K18467+K23612+K01115+K19476+K11824+K01115+K07897+K03283+K07904+K07937+K12486+K12486+K12472+K03283+K03283+K01115+…
Phagosome	ko04145	199	tissues_transcript_10084;tissues_transcript_10256;tissues_transcript_10486;tissues_transcript_10842;tissues_transcript_11188;tissues_transcript_11202;tissues_transcript_11585;tissues_transcript_11642;tissues_transcript_11945;tissues_transcript_12320;tissues_transcript_12394;tissues_transcript_12686;tissues_transcript_12719;tissues_transcript_12756;tissues_transcript_13686;tissues_transcript_13764…	K08488+K08488+K07375+K02149+K07889+K04392+K08492+K02150+K08488+K07897+K07897+K04392+K08517+K02150+K07897+K02155+K07889+K02149+K02144+K04392+K02154+K02155+K07897+K02153+K02144+K02147+K02152+K02147+K07342+K07342+K02147+K02152+K02145+K07374+K04392+K07897+K02145+K07897+K00921+K10956+K00921+K04392+K02153+K07375+K07889+K00921+K07375+K09481+K07375+K07889+K04392+K07889+K02145+K00921+K08054+K02154+K02148+…
Peroxisome	ko04146	329	tissues_transcript_10051;tissues_transcript_10170;tissues_transcript_10353;tissues_transcript_10707;tissues_transcript_10711;tissues_transcript_10805;tissues_transcript_11422;tissues_transcript_1147;tissues_transcript_11539;tissues_transcript_11578;tissues_transcript_12049;tissues_transcript_12150;tissues_transcript_1221;tissues_transcript_12572;tissues_transcript_1262;tissues_transcript_12767;ti…	K13354+K13335+K00232+K08726+K13346+K13237+K13354+K13342+K08726+K11147+K13338+K03426+K13342+K13337+K13342+K01897+K00477+K12663+K04564+K03781+K06664+K04565+K04565+K06664+K13347+K01897+K13344+K01897+K01897+K01897+K13342+K08726+K04565+K13354+K03781+K08726+K01897+K01897+K04565+K13348+K04565+K05677+K00031+K04565+K13337+K00232+K03781+K00031+K08726+K13347+K01897+K01897+K00232+K11517+K12261+K15628+K12663+…
Plant-pathogen interaction	ko04626	930	tissues_transcript_10071;tissues_transcript_10364;tissues_transcript_10476;tissues_transcript_10488;tissues_transcript_1106;tissues_transcript_11156;tissues_transcript_11265;tissues_transcript_11277;tissues_transcript_1139;tissues_transcript_11409;tissues_transcript_11427;tissues_transcript_11516;tissues_transcript_11923;tissues_transcript_12131;tissues_transcript_12546;tissues_transcript_12666;t…	K13430+K18873+K13456+K13430+K09487+K13457+K13435+K13430+K13435+K16224+K13430+K13420+K05391+K01373+K13417+K13456+K13430+K13424+K05391+K13458+K09487+K13457+K05391+K13430+K18875+K04079+K09487+K13448+K13413+K02183+K13457+K18875+K13466+K13435+K13447+K13448+K01373+K13430+K05391+K02183+K02183+K13448+K13456+K15397+K13448+K01373+K04079+K02183+K05391+K13448+K05391+K18875+K13449+K05391+K13430+K20536+K13459+…
Circadian rhythm - plant	ko04712	180	tissues_transcript_10021;tissues_transcript_10477;tissues_transcript_10713;tissues_transcript_108;tissues_transcript_118;tissues_transcript_11840;tissues_transcript_1238;tissues_transcript_13381;tissues_transcript_13507;tissues_transcript_13682;tissues_transcript_1420;tissues_transcript_16111;tissues_transcript_16492;tissues_transcript_16564;tissues_transcript_18088;tissues_transcript_18253;tissu…	K12135+K12129+K03097+K12120+K12124+K12135+K12118+K03115+K00660+K12120+K12118+K12135+K12116+K12120+K03097+K16241+K03115+K12119+K12126+K12129+K12119+K12135+K12126+K16240+K12120+K12133+K10143+K03115+K16221+K16221+K12133+K03115+K12129+K12126+K12129+K12120+K12120+K12126+K12115+K00660+K12125+K16221+K12133+K12121+K12121+K12135+K16221+K12116+K16241+K12127+K12127+K12133+K12129+K12135+K12130+K12127+K16241+…
